# Supplementary material for: DPEP1 Increases Drug Resistance in an ASCL2-Dependent Manner in Colon Cancer Cells and Correlates with Immune Cell Infiltration
Source: Research Square preprint supplement (doi:10.21203/rs.3.rs-1022827/v1), 2021-11-03
Supplement: Supplementary file 1 [file 508d210110dc16916d3520dc.xlsx]

## Sheet: Sheet1
The primer information for quantitative PCR
Primer names	Primer sequences(5'-3')
ASCL2(human)-F	ACCGCGTGAAGCTGGTG
ASCL2(human)-R	CTCCACCTTGCTCAGCTTCTT
DPEP1(human)-F	GCTGGTGAAACAGACAGACA
DPEP1(human)-R	CCTCCTTGATGTGATCCAGATG
GAPDH(human)-F	ACAACTTTGGTATCGTGGAAGG
GAPDH(human)-R	GCCATCACGCCACAGTTTC
ASCL2(human)-siRNA-1	GGGCACUGCUGCUCUGCUATT
ASCL2(human)-siRNA-2	CAAGGGAGCGUGAACUUUATT
DPEP1(human)-siRNA-1	GGAUGUACCCGGAGACCUUTT
DPEP1(human)-siRNA-2	GUGUGGUGAAGGAGCUGAATT
