# Supplementary material for: DPEP1 Increases Drug Resistance in an ASCL2-Dependent Manner in Colon Cancer Cells and Correlates with Immune Cell Infiltration
Source: Research Square preprint supplement (doi:10.21203/rs.3.rs-1022827/v1), 2021-11-03
Supplement: Supplementary file 2 [file a75325be05e6c0100e81c087.xlsx]

## Sheet: Sheet1
Correlation analysis for DPEP1 in TCGA-COAD
gene_name	gene_id	gene_biotype	cor_pearson	p_pearson
AXIN2	ENSG00000168646	protein_coding	0.628134	2.61673e-72
QPRT	ENSG00000103485	protein_coding	0.599364	2.38746e-64
SLC39A5	ENSG00000139540	protein_coding	0.59746	7.52495e-64
ASCL2	ENSG00000183734	protein_coding	0.592984	1.08557e-62
ENGASE	ENSG00000167280	protein_coding	0.585683	7.71835e-61
NKD1	ENSG00000140807	protein_coding	0.573687	6.76894e-58
HUNK	ENSG00000142149	protein_coding	0.571241	2.60546e-57
PRAP1	ENSG00000165828	protein_coding	0.560009	1.10005e-54
RNF43	ENSG00000108375	protein_coding	0.558504	2.43015e-54
EPHB2	ENSG00000133216	protein_coding	0.55689	5.66248e-54
VIL1	ENSG00000127831	protein_coding	0.552176	6.51632e-53
TNNC2	ENSG00000101470	protein_coding	0.548317	4.67773e-52
SLC5A6	ENSG00000138074	protein_coding	0.54334	5.7263e-51
CEL	ENSG00000170835	protein_coding	0.54238	9.2416e-51
CAB39L	ENSG00000102547	protein_coding	0.535596	2.59929e-49
NOTUM	ENSG00000185269	protein_coding	0.531586	1.80243e-48
APCDD1	ENSG00000154856	protein_coding	0.522951	1.0706e-46
KRT23	ENSG00000108244	protein_coding	0.519329	5.73481e-46
MAP1LC3A	ENSG00000101460	protein_coding	0.518828	7.22084e-46
PLA2G4F	ENSG00000168907	protein_coding	0.515782	2.9092e-45
AIFM3	ENSG00000183773	protein_coding	0.514873	4.39761e-45
RUBCNL	ENSG00000102445	protein_coding	0.513485	8.24183e-45
MAB21L4	ENSG00000172478	protein_coding	0.512908	1.0695e-44
GPR143	ENSG00000101850	protein_coding	0.511035	2.48242e-44
CDX2	ENSG00000165556	protein_coding	0.507992	9.63639e-44
LY6G6D	ENSG00000244355	protein_coding	0.497372	9.86474e-42
RBBP8NL	ENSG00000130701	protein_coding	0.49724	1.04406e-41
GJB1	ENSG00000169562	protein_coding	0.496461	1.45668e-41
FCGRT	ENSG00000104870	protein_coding	0.49576	1.96449e-41
ANO9	ENSG00000185101	protein_coding	0.495252	2.43781e-41
CYP2B6	ENSG00000197408	protein_coding	0.495096	2.60535e-41
LY6G6F	ENSG00000250641	protein_coding	0.493996	4.15527e-41
GGT7	ENSG00000131067	protein_coding	0.492746	7.04748e-41
SLC22A11	ENSG00000168065	protein_coding	0.487431	6.50182e-40
AHCY	ENSG00000101444	protein_coding	0.485922	1.21301e-39
ZSWIM3	ENSG00000132801	protein_coding	0.484546	2.13639e-39
SLC2A8	ENSG00000136856	protein_coding	0.483101	3.86024e-39
ERGIC3	ENSG00000125991	protein_coding	0.481063	8.85321e-39
CARS2	ENSG00000134905	protein_coding	0.480769	9.97077e-39
NKD2	ENSG00000145506	protein_coding	0.480353	1.18028e-38
CDHR1	ENSG00000148600	protein_coding	0.480036	1.34203e-38
MOCS3	ENSG00000124217	protein_coding	0.47826	2.74625e-38
PLA2G12B	ENSG00000138308	protein_coding	0.477926	3.1407e-38
ACOT8	ENSG00000101473	protein_coding	0.477315	4.01258e-38
PRDX5	ENSG00000126432	protein_coding	0.476004	6.77951e-38
C10orf99	ENSG00000188373	protein_coding	0.475677	7.72099e-38
KCNQ1	ENSG00000053918	protein_coding	0.475333	8.85735e-38
RALY	ENSG00000125970	protein_coding	0.474435	1.26561e-37
TDGF1	ENSG00000241186	protein_coding	0.472767	2.45006e-37
SLC52A2	ENSG00000185803	protein_coding	0.472308	2.93561e-37
B3GNT8	ENSG00000177191	protein_coding	0.471719	3.7023e-37
INPP5J	ENSG00000185133	protein_coding	0.471222	4.50093e-37
TCF7	ENSG00000081059	protein_coding	0.470891	5.12631e-37
NELFCD	ENSG00000101158	protein_coding	0.470402	6.20798e-37
EIF6	ENSG00000242372	protein_coding	0.469966	7.36412e-37
CXXC5	ENSG00000171604	protein_coding	0.468215	1.45772e-36
GTF2IRD1	ENSG00000006704	protein_coding	0.468038	1.56197e-36
FITM2	ENSG00000197296	protein_coding	0.465542	4.10358e-36
FBXL6	ENSG00000182325	protein_coding	0.462548	1.29417e-35
AMACR	ENSG00000242110	protein_coding	0.461871	1.67547e-35
OVOL1	ENSG00000172818	protein_coding	0.460447	2.87742e-35
SELENBP1	ENSG00000143416	protein_coding	0.458421	6.18595e-35
ACTL10	ENSG00000182584	protein_coding	0.457975	7.31725e-35
CRB2	ENSG00000148204	protein_coding	0.457943	7.40422e-35
PPP1R14D	ENSG00000166143	protein_coding	0.456503	1.27088e-34
REPIN1	ENSG00000214022	protein_coding	0.453939	3.30266e-34
CYP2W1	ENSG00000073067	protein_coding	0.453092	4.52049e-34
SCAP	ENSG00000114650	protein_coding	0.451548	7.98879e-34
SYT7	ENSG00000011347	protein_coding	0.451252	8.90937e-34
RPIA	ENSG00000153574	protein_coding	0.45004	1.39006e-33
GGH	ENSG00000137563	protein_coding	0.44973	1.55675e-33
LRP4	ENSG00000134569	protein_coding	0.449582	1.64346e-33
DDC	ENSG00000132437	protein_coding	0.448812	2.17727e-33
CPNE7	ENSG00000178773	protein_coding	0.448355	2.57165e-33
RBP2	ENSG00000114113	protein_coding	0.446677	4.72901e-33
ADCK5	ENSG00000173137	protein_coding	0.445152	8.20517e-33
DACH1	ENSG00000276644	protein_coding	0.444166	1.16975e-32
POFUT1	ENSG00000101346	protein_coding	0.443819	1.32465e-32
ADGRG1	ENSG00000205336	protein_coding	0.443519	1.4755e-32
TBRG4	ENSG00000136270	protein_coding	0.442556	2.08213e-32
SLC39A4	ENSG00000147804	protein_coding	0.441506	3.02738e-32
ZNF775	ENSG00000196456	protein_coding	0.441012	3.60913e-32
IHH	ENSG00000163501	protein_coding	0.440999	3.6263e-32
DNAJA3	ENSG00000103423	protein_coding	0.440228	4.76751e-32
PIGU	ENSG00000101464	protein_coding	0.438523	8.70738e-32
CCDC170	ENSG00000120262	protein_coding	0.437894	1.0868e-31
SPIRE2	ENSG00000204991	protein_coding	0.43752	1.23937e-31
GNG4	ENSG00000168243	protein_coding	0.436692	1.6572e-31
PTP4A3	ENSG00000184489	protein_coding	0.436091	2.04526e-31
FGFR4	ENSG00000160867	protein_coding	0.435974	2.13054e-31
ASPSCR1	ENSG00000169696	protein_coding	0.434573	3.47147e-31
CPNE1	ENSG00000214078	protein_coding	0.434365	3.73297e-31
ALDH4A1	ENSG00000159423	protein_coding	0.433183	5.62523e-31
TP53RK	ENSG00000172315	protein_coding	0.431357	1.05648e-30
PXMP4	ENSG00000101417	protein_coding	0.430921	1.22703e-30
VAV3	ENSG00000134215	protein_coding	0.429874	1.75758e-30
F10	ENSG00000126218	protein_coding	0.429792	1.80769e-30
UBAC2	ENSG00000134882	protein_coding	0.429047	2.33144e-30
GSS	ENSG00000100983	protein_coding	0.428487	2.82301e-30
TLE2	ENSG00000065717	protein_coding	0.427942	3.39815e-30
FAM3B	ENSG00000183844	protein_coding	0.427513	3.93147e-30
HNF4A	ENSG00000101076	protein_coding	0.42724	4.31298e-30
PSMA7	ENSG00000101182	protein_coding	0.427212	4.35503e-30
TOMM34	ENSG00000025772	protein_coding	0.4259	6.78988e-30
KLC4	ENSG00000137171	protein_coding	0.424496	1.09024e-29
TSPAN6	ENSG00000000003	protein_coding	0.424415	1.12002e-29
H2AJ	ENSG00000246705	protein_coding	0.424307	1.16157e-29
ZSWIM1	ENSG00000168612	protein_coding	0.422202	2.35065e-29
PLAGL2	ENSG00000126003	protein_coding	0.421827	2.66402e-29
GPR35	ENSG00000178623	protein_coding	0.421811	2.67785e-29
ADAMTSL2	ENSG00000197859	protein_coding	0.421321	3.15318e-29
CEBPA	ENSG00000245848	protein_coding	0.421124	3.36595e-29
ASB13	ENSG00000196372	protein_coding	0.420944	3.57385e-29
PALD1	ENSG00000107719	protein_coding	0.420772	3.78422e-29
UCKL1	ENSG00000198276	protein_coding	0.420725	3.84376e-29
GLYCTK	ENSG00000168237	protein_coding	0.420347	4.35794e-29
COMT	ENSG00000093010	protein_coding	0.41973	5.34577e-29
RTKN	ENSG00000114993	protein_coding	0.418951	6.91671e-29
PRMT7	ENSG00000132600	protein_coding	0.418487	8.05954e-29
TBX10	ENSG00000167800	protein_coding	0.417126	1.26096e-28
ESPN	ENSG00000187017	protein_coding	0.416976	1.32434e-28
WNT11	ENSG00000085741	protein_coding	0.416589	1.50369e-28
NSMCE1	ENSG00000169189	protein_coding	0.416484	1.55594e-28
CHMP4B	ENSG00000101421	protein_coding	0.41586	1.90855e-28
SLC35C2	ENSG00000080189	protein_coding	0.41581	1.9396e-28
ROMO1	ENSG00000125995	protein_coding	0.414756	2.73521e-28
SHROOM2	ENSG00000146950	protein_coding	0.414495	2.9772e-28
UQCC1	ENSG00000101019	protein_coding	0.414044	3.44808e-28
PMFBP1	ENSG00000118557	protein_coding	0.413486	4.13162e-28
LZTS3	ENSG00000088899	protein_coding	0.4124	5.87143e-28
QTRT1	ENSG00000213339	protein_coding	0.412288	6.08607e-28
POU5F1B	ENSG00000212993	protein_coding	0.412216	6.22996e-28
TSPEAR	ENSG00000175894	protein_coding	0.412075	6.5197e-28
PDRG1	ENSG00000088356	protein_coding	0.411829	7.05814e-28
TSC22D1	ENSG00000102804	protein_coding	0.411721	7.30842e-28
SGK2	ENSG00000101049	protein_coding	0.41133	8.28922e-28
EXOSC5	ENSG00000077348	protein_coding	0.411285	8.40835e-28
NECAB3	ENSG00000125967	protein_coding	0.409803	1.35279e-27
IGSF23	ENSG00000216588	protein_coding	0.409687	1.40423e-27
FAAH	ENSG00000117480	protein_coding	0.409582	1.45199e-27
ABCC6	ENSG00000091262	protein_coding	0.40894	1.78245e-27
WNK2	ENSG00000165238	protein_coding	0.408678	1.93782e-27
DHRS12	ENSG00000102796	protein_coding	0.408499	2.05172e-27
EFNA4	ENSG00000243364	protein_coding	0.40797	2.42788e-27
TRPC4AP	ENSG00000100991	protein_coding	0.407585	2.74466e-27
LFNG	ENSG00000106003	protein_coding	0.407422	2.89027e-27
SLC35E4	ENSG00000100036	protein_coding	0.407264	3.03879e-27
TSNARE1	ENSG00000171045	protein_coding	0.407137	3.1639e-27
PHB	ENSG00000167085	protein_coding	0.407108	3.19341e-27
NUDT14	ENSG00000183828	protein_coding	0.406622	3.7249e-27
TOP1MT	ENSG00000184428	protein_coding	0.406479	3.8971e-27
SPIN2B	ENSG00000186787	protein_coding	0.405551	5.22469e-27
AAR2	ENSG00000131043	protein_coding	0.405104	6.01495e-27
LCN12	ENSG00000184925	protein_coding	0.404894	6.4264e-27
RNF114	ENSG00000124226	protein_coding	0.404691	6.85106e-27
DLX3	ENSG00000064195	protein_coding	0.404247	7.87708e-27
CLCN2	ENSG00000114859	protein_coding	0.403867	8.87515e-27
PAAF1	ENSG00000175575	protein_coding	0.403563	9.7618e-27
CLDN3	ENSG00000165215	protein_coding	0.403543	9.82271e-27
SPHK2	ENSG00000063176	protein_coding	0.402678	1.28765e-26
NUAK2	ENSG00000163545	protein_coding	0.401567	1.82104e-26
MYC	ENSG00000136997	protein_coding	0.40144	1.89419e-26
HNF1A	ENSG00000135100	protein_coding	0.401419	1.9067e-26
ZNF503	ENSG00000165655	protein_coding	0.401352	1.94704e-26
PEX16	ENSG00000121680	protein_coding	0.401164	2.06424e-26
BCS1L	ENSG00000074582	protein_coding	0.400845	2.27879e-26
TMEM9	ENSG00000116857	protein_coding	0.400117	2.85594e-26
RBP1	ENSG00000114115	protein_coding	0.400005	2.95755e-26
DAGLA	ENSG00000134780	protein_coding	0.399995	2.96589e-26
PRR15	ENSG00000176532	protein_coding	0.399741	3.20879e-26
MPST	ENSG00000128309	protein_coding	0.399452	3.50912e-26
GATD1	ENSG00000177225	protein_coding	0.399262	3.7214e-26
DDX27	ENSG00000124228	protein_coding	0.39881	4.27823e-26
PTPRO	ENSG00000151490	protein_coding	0.398805	4.28484e-26
CAPN13	ENSG00000162949	protein_coding	0.398601	4.56194e-26
ACSL5	ENSG00000197142	protein_coding	0.398184	5.18728e-26
ABLIM2	ENSG00000163995	protein_coding	0.397931	5.60762e-26
PRPF6	ENSG00000101161	protein_coding	0.397722	5.9787e-26
FAH	ENSG00000103876	protein_coding	0.397568	6.26821e-26
TMEM249	ENSG00000261587	protein_coding	0.397227	6.95975e-26
RAB5IF	ENSG00000101084	protein_coding	0.397091	7.25619e-26
NUDT16L1	ENSG00000168101	protein_coding	0.396378	9.02705e-26
PIGT	ENSG00000124155	protein_coding	0.395942	1.0314e-25
FCSK	ENSG00000157353	protein_coding	0.395781	1.0833e-25
PCIF1	ENSG00000100982	protein_coding	0.395703	1.10941e-25
MTG2	ENSG00000101181	protein_coding	0.395699	1.11064e-25
GMEB2	ENSG00000101216	protein_coding	0.395482	1.18678e-25
SCARB1	ENSG00000073060	protein_coding	0.394383	1.65827e-25
AC004805.1	ENSG00000266076	protein_coding	0.393835	1.95803e-25
HM13	ENSG00000101294	protein_coding	0.393367	2.25637e-25
C10orf82	ENSG00000165863	protein_coding	0.393329	2.28264e-25
DUS1L	ENSG00000169718	protein_coding	0.392687	2.77082e-25
TIMM17B	ENSG00000126768	protein_coding	0.392522	2.91246e-25
PLEKHJ1	ENSG00000104886	protein_coding	0.392097	3.31048e-25
AGT	ENSG00000135744	protein_coding	0.391765	3.65888e-25
PCID2	ENSG00000126226	protein_coding	0.391124	4.43737e-25
VPS51	ENSG00000149823	protein_coding	0.390556	5.26163e-25
ST14	ENSG00000149418	protein_coding	0.390435	5.45599e-25
MRPL57	ENSG00000173141	protein_coding	0.390167	5.91232e-25
ASGR1	ENSG00000141505	protein_coding	0.389879	6.44273e-25
NEURL2	ENSG00000124257	protein_coding	0.389156	7.99562e-25
RABEP2	ENSG00000177548	protein_coding	0.389132	8.05351e-25
OIT3	ENSG00000138315	protein_coding	0.38823	1.05374e-24
GHDC	ENSG00000167925	protein_coding	0.388129	1.08582e-24
GPX2	ENSG00000176153	protein_coding	0.38779	1.20075e-24
RPS21	ENSG00000171858	protein_coding	0.387586	1.27596e-24
MOGAT3	ENSG00000106384	protein_coding	0.387563	1.28466e-24
TPRN	ENSG00000176058	protein_coding	0.387391	1.35164e-24
PPP1R16A	ENSG00000160972	protein_coding	0.387224	1.42024e-24
BOP1	ENSG00000261236	protein_coding	0.387193	1.43344e-24
LRRC2	ENSG00000163827	protein_coding	0.387025	1.50649e-24
SPATA2	ENSG00000158480	protein_coding	0.386745	1.63683e-24
KRT40	ENSG00000204889	protein_coding	0.386204	1.92068e-24
SCAND1	ENSG00000171222	protein_coding	0.385991	2.04547e-24
ABAT	ENSG00000183044	protein_coding	0.385573	2.31371e-24
SESN1	ENSG00000080546	protein_coding	0.385512	2.35572e-24
GUCY2C	ENSG00000070019	protein_coding	0.385444	2.40329e-24
ANKRD16	ENSG00000134461	protein_coding	0.385367	2.4583e-24
PPFIBP2	ENSG00000166387	protein_coding	0.385277	2.52402e-24
TRAPPC6A	ENSG00000007255	protein_coding	0.385195	2.58632e-24
PQBP1	ENSG00000102103	protein_coding	0.384498	3.17386e-24
CXCL14	ENSG00000145824	protein_coding	0.384288	3.37552e-24
NCK2	ENSG00000071051	protein_coding	0.383899	3.78362e-24
PKLR	ENSG00000143627	protein_coding	0.383874	3.8112e-24
CDK5RAP1	ENSG00000101391	protein_coding	0.383351	4.44215e-24
RPL13	ENSG00000167526	protein_coding	0.382654	5.44468e-24
C8orf33	ENSG00000182307	protein_coding	0.382318	6.00547e-24
ACOX2	ENSG00000168306	protein_coding	0.382265	6.09871e-24
CDX1	ENSG00000113722	protein_coding	0.382222	6.1749e-24
NTHL1	ENSG00000065057	protein_coding	0.382042	6.50739e-24
BCL11A	ENSG00000119866	protein_coding	0.381804	6.97379e-24
NOTCH1	ENSG00000148400	protein_coding	0.381152	8.4276e-24
NR1I2	ENSG00000144852	protein_coding	0.3811	8.55738e-24
RAE1	ENSG00000101146	protein_coding	0.380341	1.06614e-23
FGFRL1	ENSG00000127418	protein_coding	0.380326	1.07092e-23
LY6G6E	ENSG00000255552	protein_coding	0.380071	1.15259e-23
DOK4	ENSG00000125170	protein_coding	0.38003	1.16642e-23
PRKAR1B	ENSG00000188191	protein_coding	0.379547	1.34112e-23
HSD11B2	ENSG00000176387	protein_coding	0.379544	1.34243e-23
GYG2	ENSG00000056998	protein_coding	0.379509	1.35579e-23
TMEM150A	ENSG00000168890	protein_coding	0.377975	2.10822e-23
RABEPK	ENSG00000136933	protein_coding	0.377846	2.18794e-23
HSF1	ENSG00000185122	protein_coding	0.377675	2.29814e-23
GID8	ENSG00000101193	protein_coding	0.377326	2.53976e-23
MON1A	ENSG00000164077	protein_coding	0.377273	2.57859e-23
DGAT2	ENSG00000062282	protein_coding	0.376977	2.80655e-23
SLC25A26	ENSG00000144741	protein_coding	0.376629	3.09978e-23
MYO15B	ENSG00000266714	protein_coding	0.376388	3.32022e-23
NAT9	ENSG00000109065	protein_coding	0.376256	3.44842e-23
PPP1R14C	ENSG00000198729	protein_coding	0.376179	3.52498e-23
MYOM3	ENSG00000142661	protein_coding	0.375948	3.76459e-23
SUSD3	ENSG00000157303	protein_coding	0.375885	3.83271e-23
ID1	ENSG00000125968	protein_coding	0.375843	3.87863e-23
TMEM150B	ENSG00000180061	protein_coding	0.375413	4.38418e-23
FGF18	ENSG00000156427	protein_coding	0.375336	4.48188e-23
CYP4F2	ENSG00000186115	protein_coding	0.375305	4.52037e-23
LAGE3	ENSG00000196976	protein_coding	0.374232	6.13099e-23
SOWAHA	ENSG00000198944	protein_coding	0.374174	6.23144e-23
CTTNBP2	ENSG00000077063	protein_coding	0.373589	7.35396e-23
TMEM176A	ENSG00000002933	protein_coding	0.372942	8.8278e-23
BIN1	ENSG00000136717	protein_coding	0.372926	8.86697e-23
MLH1	ENSG00000076242	protein_coding	0.372851	9.05739e-23
RNF113A	ENSG00000125352	protein_coding	0.37274	9.34509e-23
SPATA33	ENSG00000167523	protein_coding	0.37246	1.01136e-22
LRRC43	ENSG00000158113	protein_coding	0.372404	1.0273e-22
DRD2	ENSG00000149295	protein_coding	0.372328	1.04956e-22
SLC6A4	ENSG00000108576	protein_coding	0.372146	1.10478e-22
NAXD	ENSG00000213995	protein_coding	0.371937	1.17157e-22
DUSP18	ENSG00000167065	protein_coding	0.371461	1.339e-22
TRABD2A	ENSG00000186854	protein_coding	0.371067	1.49548e-22
RPN2	ENSG00000118705	protein_coding	0.371007	1.5209e-22
ILVBL	ENSG00000105135	protein_coding	0.370768	1.62611e-22
TLDC2	ENSG00000101342	protein_coding	0.369814	2.12257e-22
GRTP1	ENSG00000139835	protein_coding	0.369538	2.29271e-22
OSER1	ENSG00000132823	protein_coding	0.368891	2.74524e-22
ACOT11	ENSG00000162390	protein_coding	0.3688	2.81514e-22
ANXA9	ENSG00000143412	protein_coding	0.368667	2.92145e-22
SLC3A2	ENSG00000168003	protein_coding	0.368441	3.11035e-22
IFRD2	ENSG00000214706	protein_coding	0.367335	4.22605e-22
HSD17B10	ENSG00000072506	protein_coding	0.366963	4.6843e-22
ZNF74	ENSG00000185252	protein_coding	0.366875	4.79891e-22
KATNB1	ENSG00000140854	protein_coding	0.366361	5.53023e-22
FRMD1	ENSG00000153303	protein_coding	0.366093	5.95319e-22
ARSL	ENSG00000157399	protein_coding	0.365921	6.24259e-22
GRK1	ENSG00000185974	protein_coding	0.36577	6.50724e-22
SPATA25	ENSG00000149634	protein_coding	0.365767	6.51277e-22
DECR2	ENSG00000242612	protein_coding	0.365761	6.52344e-22
USH1C	ENSG00000006611	protein_coding	0.36571	6.61559e-22
SULT2B1	ENSG00000088002	protein_coding	0.365662	6.70303e-22
LLGL2	ENSG00000073350	protein_coding	0.365537	6.93796e-22
CC2D1A	ENSG00000132024	protein_coding	0.365464	7.07898e-22
XPNPEP2	ENSG00000122121	protein_coding	0.365427	7.14996e-22
WDR77	ENSG00000116455	protein_coding	0.365245	7.51714e-22
ESRRA	ENSG00000173153	protein_coding	0.365091	7.84046e-22
COMMD7	ENSG00000149600	protein_coding	0.365058	7.91211e-22
DPH2	ENSG00000132768	protein_coding	0.364951	8.1495e-22
CLCN7	ENSG00000103249	protein_coding	0.364759	8.5879e-22
ID3	ENSG00000117318	protein_coding	0.364659	8.82785e-22
DUS3L	ENSG00000141994	protein_coding	0.364463	9.31556e-22
DDAH2	ENSG00000213722	protein_coding	0.364024	1.0502e-21
CCL24	ENSG00000106178	protein_coding	0.363969	1.06616e-21
SLC13A3	ENSG00000158296	protein_coding	0.363671	1.15676e-21
KHDRBS3	ENSG00000131773	protein_coding	0.363473	1.22068e-21
ADRM1	ENSG00000130706	protein_coding	0.363173	1.32507e-21
PSKH1	ENSG00000159792	protein_coding	0.36279	1.47066e-21
AXIN1	ENSG00000103126	protein_coding	0.362579	1.55739e-21
LARGE2	ENSG00000165905	protein_coding	0.362551	1.56942e-21
TH	ENSG00000180176	protein_coding	0.361566	2.05042e-21
NOB1	ENSG00000141101	protein_coding	0.361524	2.07381e-21
JUN	ENSG00000177606	protein_coding	0.361421	2.1323e-21
DEFA6	ENSG00000164822	protein_coding	0.3612	2.26379e-21
TMEM252	ENSG00000181778	protein_coding	0.360916	2.44485e-21
CDK8	ENSG00000132964	protein_coding	0.360868	2.47659e-21
CRYL1	ENSG00000165475	protein_coding	0.360772	2.54213e-21
ACSL6	ENSG00000164398	protein_coding	0.360625	2.64451e-21
ZNRF3	ENSG00000183579	protein_coding	0.360625	2.6452e-21
GTF3C5	ENSG00000148308	protein_coding	0.360572	2.68276e-21
CISH	ENSG00000114737	protein_coding	0.360352	2.84734e-21
SPINK1	ENSG00000164266	protein_coding	0.360176	2.9857e-21
PUF60	ENSG00000179950	protein_coding	0.359895	3.22044e-21
SYK	ENSG00000165025	protein_coding	0.359859	3.25205e-21
SLC37A4	ENSG00000137700	protein_coding	0.359812	3.29303e-21
IDH3G	ENSG00000067829	protein_coding	0.359797	3.30677e-21
SLC30A2	ENSG00000158014	protein_coding	0.35962	3.46837e-21
KIF12	ENSG00000136883	protein_coding	0.359582	3.50382e-21
MPP1	ENSG00000130830	protein_coding	0.359422	3.65819e-21
LY6G6F	ENSG00000204424	protein_coding	0.359209	3.87283e-21
SMTNL2	ENSG00000188176	protein_coding	0.359009	4.08665e-21
ISM2	ENSG00000100593	protein_coding	0.358948	4.15439e-21
NOSIP	ENSG00000142546	protein_coding	0.358709	4.42922e-21
HES6	ENSG00000144485	protein_coding	0.358706	4.4333e-21
ACY1	ENSG00000243989	protein_coding	0.35853	4.64783e-21
TRMT61A	ENSG00000166166	protein_coding	0.358519	4.66103e-21
TTI1	ENSG00000101407	protein_coding	0.358463	4.73162e-21
RRP9	ENSG00000114767	protein_coding	0.358419	4.78792e-21
ANKH	ENSG00000154122	protein_coding	0.358302	4.94009e-21
R3HDML	ENSG00000101074	protein_coding	0.35791	5.48735e-21
CIAO3	ENSG00000103245	protein_coding	0.357668	5.85378e-21
MYH7B	ENSG00000078814	protein_coding	0.35684	7.30107e-21
KCTD17	ENSG00000100379	protein_coding	0.356596	7.7925e-21
NFS1	ENSG00000244005	protein_coding	0.356418	8.16926e-21
RTF2	ENSG00000022277	protein_coding	0.356172	8.72174e-21
PTK7	ENSG00000112655	protein_coding	0.356005	9.11836e-21
BID	ENSG00000015475	protein_coding	0.356004	9.11998e-21
EPS8L3	ENSG00000198758	protein_coding	0.355989	9.15777e-21
DAPK2	ENSG00000035664	protein_coding	0.355978	9.18359e-21
ZNF517	ENSG00000197363	protein_coding	0.355809	9.60609e-21
MEP1A	ENSG00000112818	protein_coding	0.355779	9.68299e-21
SHROOM1	ENSG00000164403	protein_coding	0.355758	9.73518e-21
LAPTM4B	ENSG00000104341	protein_coding	0.355672	9.96145e-21
PARS2	ENSG00000162396	protein_coding	0.355657	9.99966e-21
PLXNB1	ENSG00000164050	protein_coding	0.355545	1.03021e-20
EMID1	ENSG00000186998	protein_coding	0.355497	1.04338e-20
CDK10	ENSG00000185324	protein_coding	0.355227	1.12085e-20
SMYD5	ENSG00000135632	protein_coding	0.355002	1.18958e-20
THRA	ENSG00000126351	protein_coding	0.354988	1.19415e-20
LAMP1	ENSG00000185896	protein_coding	0.35459	1.32656e-20
MGAT4B	ENSG00000161013	protein_coding	0.354574	1.33214e-20
ARID3A	ENSG00000116017	protein_coding	0.354514	1.35377e-20
ATP9A	ENSG00000054793	protein_coding	0.354488	1.36281e-20
MOCS1	ENSG00000124615	protein_coding	0.354481	1.36544e-20
POLR3E	ENSG00000058600	protein_coding	0.35446	1.37317e-20
CBFA2T2	ENSG00000078699	protein_coding	0.354105	1.50783e-20
VENTX	ENSG00000151650	protein_coding	0.353905	1.58983e-20
NSDHL	ENSG00000147383	protein_coding	0.35377	1.64717e-20
METTL26	ENSG00000130731	protein_coding	0.353105	1.96226e-20
COL9A3	ENSG00000092758	protein_coding	0.353084	1.97349e-20
TMEM177	ENSG00000144120	protein_coding	0.352957	2.0402e-20
QARS1	ENSG00000172053	protein_coding	0.352908	2.06663e-20
SLC19A3	ENSG00000135917	protein_coding	0.35273	2.16584e-20
DYNLRB1	ENSG00000125971	protein_coding	0.352552	2.26952e-20
FBXO31	ENSG00000103264	protein_coding	0.352441	2.33624e-20
ACTR1B	ENSG00000115073	protein_coding	0.351964	2.64769e-20
CSTF1	ENSG00000101138	protein_coding	0.35174	2.8074e-20
GRINA	ENSG00000178719	protein_coding	0.351247	3.19328e-20
DGAT1	ENSG00000185000	protein_coding	0.350632	3.7495e-20
C16orf91	ENSG00000174109	protein_coding	0.350272	4.1177e-20
AP5Z1	ENSG00000242802	protein_coding	0.350039	4.37553e-20
CKMT2	ENSG00000131730	protein_coding	0.349897	4.54049e-20
ARFGAP1	ENSG00000101199	protein_coding	0.349671	4.81421e-20
RPS3	ENSG00000149273	protein_coding	0.349541	4.97946e-20
DHX34	ENSG00000134815	protein_coding	0.349506	5.02548e-20
RHBDL1	ENSG00000103269	protein_coding	0.349436	5.11831e-20
TMEM176B	ENSG00000106565	protein_coding	0.349042	5.6683e-20
CTU2	ENSG00000174177	protein_coding	0.349022	5.69735e-20
PHGR1	ENSG00000233041	protein_coding	0.348975	5.76736e-20
SNTB1	ENSG00000172164	protein_coding	0.348573	6.40061e-20
EEF1AKMT1	ENSG00000150456	protein_coding	0.348478	6.55868e-20
EDEM2	ENSG00000088298	protein_coding	0.348427	6.64725e-20
RPL8	ENSG00000161016	protein_coding	0.348344	6.79004e-20
MLXIPL	ENSG00000009950	protein_coding	0.34824	6.97509e-20
PKP3	ENSG00000184363	protein_coding	0.347877	7.66161e-20
ISX	ENSG00000175329	protein_coding	0.347796	7.82279e-20
PRSS8	ENSG00000052344	protein_coding	0.347668	8.08561e-20
PROSER2	ENSG00000148426	protein_coding	0.347371	8.72856e-20
TMEM150C	ENSG00000249242	protein_coding	0.347324	8.83489e-20
SPIN3	ENSG00000204271	protein_coding	0.346953	9.72106e-20
MYADML2	ENSG00000185105	protein_coding	0.346814	1.00743e-19
ZFP64	ENSG00000020256	protein_coding	0.346737	1.02768e-19
KHK	ENSG00000138030	protein_coding	0.346571	1.07233e-19
CPSF1	ENSG00000071894	protein_coding	0.346373	1.12842e-19
BCAP31	ENSG00000185825	protein_coding	0.346346	1.13615e-19
TPD52L2	ENSG00000101150	protein_coding	0.346217	1.17441e-19
ARHGEF10L	ENSG00000074964	protein_coding	0.345972	1.25063e-19
SFXN5	ENSG00000144040	protein_coding	0.345914	1.26928e-19
FAM234A	ENSG00000167930	protein_coding	0.345869	1.28383e-19
ARMC6	ENSG00000105676	protein_coding	0.345577	1.38367e-19
FARP1	ENSG00000152767	protein_coding	0.345401	1.44727e-19
EMC10	ENSG00000161671	protein_coding	0.345318	1.47857e-19
ALDH2	ENSG00000111275	protein_coding	0.345136	1.54882e-19
VWA2	ENSG00000165816	protein_coding	0.345081	1.57078e-19
CAPS	ENSG00000105519	protein_coding	0.345043	1.58625e-19
EIF4EBP3	ENSG00000243056	protein_coding	0.344771	1.70027e-19
REXO4	ENSG00000148300	protein_coding	0.344378	1.87957e-19
OAF	ENSG00000184232	protein_coding	0.344357	1.88937e-19
PGAP2	ENSG00000148985	protein_coding	0.344232	1.95068e-19
MAP7D2	ENSG00000184368	protein_coding	0.344026	2.05588e-19
VPS28	ENSG00000160948	protein_coding	0.343895	2.12516e-19
LAMTOR4	ENSG00000188186	protein_coding	0.343076	2.61706e-19
SCRIB	ENSG00000180900	protein_coding	0.343041	2.64046e-19
CDC16	ENSG00000130177	protein_coding	0.342983	2.67917e-19
FREM2	ENSG00000150893	protein_coding	0.342797	2.80859e-19
SMIM22	ENSG00000267795	protein_coding	0.34269	2.88592e-19
CCDC22	ENSG00000101997	protein_coding	0.342421	3.08916e-19
LSM7	ENSG00000130332	protein_coding	0.341993	3.44221e-19
SPATA2L	ENSG00000158792	protein_coding	0.341986	3.44807e-19
TELO2	ENSG00000100726	protein_coding	0.341756	3.655e-19
SLC3A1	ENSG00000138079	protein_coding	0.341728	3.68052e-19
CFTR	ENSG00000001626	protein_coding	0.341642	3.76167e-19
PLEKHG6	ENSG00000008323	protein_coding	0.341595	3.8063e-19
WDR74	ENSG00000133316	protein_coding	0.341565	3.8348e-19
IL22RA1	ENSG00000142677	protein_coding	0.341486	3.91248e-19
MFSD3	ENSG00000167700	protein_coding	0.34146	3.93822e-19
MYBL2	ENSG00000101057	protein_coding	0.341451	3.94645e-19
CHCHD6	ENSG00000159685	protein_coding	0.341331	4.06829e-19
FGFR3	ENSG00000068078	protein_coding	0.341132	4.2775e-19
DDX49	ENSG00000105671	protein_coding	0.341055	4.36103e-19
DNAJC5	ENSG00000101152	protein_coding	0.340862	4.57838e-19
OVGP1	ENSG00000085465	protein_coding	0.340791	4.66024e-19
ETS2	ENSG00000157557	protein_coding	0.340411	5.12831e-19
ACTR5	ENSG00000101442	protein_coding	0.340312	5.25745e-19
CYHR1	ENSG00000187954	protein_coding	0.340275	5.30568e-19
AMT	ENSG00000145020	protein_coding	0.339566	6.33778e-19
CMTM8	ENSG00000170293	protein_coding	0.339331	6.7226e-19
SLC2A9	ENSG00000109667	protein_coding	0.339297	6.77911e-19
BYSL	ENSG00000112578	protein_coding	0.339178	6.98439e-19
E2F4	ENSG00000205250	protein_coding	0.33908	7.15863e-19
FLAD1	ENSG00000160688	protein_coding	0.338759	7.75628e-19
ATIC	ENSG00000138363	protein_coding	0.338572	8.12668e-19
SHARPIN	ENSG00000179526	protein_coding	0.33856	8.15157e-19
SEMA3F	ENSG00000001617	protein_coding	0.338352	8.58374e-19
ZNF696	ENSG00000185730	protein_coding	0.338073	9.20387e-19
NR0B2	ENSG00000131910	protein_coding	0.338045	9.26797e-19
COQ8A	ENSG00000163050	protein_coding	0.337548	1.04868e-18
ARL2	ENSG00000213465	protein_coding	0.337237	1.13307e-18
THEM6	ENSG00000130193	protein_coding	0.337191	1.14604e-18
UMODL1	ENSG00000177398	protein_coding	0.337068	1.1814e-18
MSI1	ENSG00000135097	protein_coding	0.33696	1.21369e-18
PTDSS2	ENSG00000174915	protein_coding	0.336907	1.22979e-18
NUFIP1	ENSG00000083635	protein_coding	0.336687	1.29848e-18
MROH1	ENSG00000179832	protein_coding	0.336663	1.30632e-18
EBP	ENSG00000147155	protein_coding	0.336577	1.33449e-18
TM9SF4	ENSG00000101337	protein_coding	0.336564	1.33891e-18
NAALADL1	ENSG00000168060	protein_coding	0.336458	1.3745e-18
TMEM186	ENSG00000184857	protein_coding	0.335902	1.57699e-18
RAB40C	ENSG00000197562	protein_coding	0.335889	1.58206e-18
MEX3A	ENSG00000254726	protein_coding	0.335881	1.5851e-18
ZMYND8	ENSG00000101040	protein_coding	0.335876	1.58736e-18
FGGY	ENSG00000172456	protein_coding	0.335732	1.6446e-18
LRRC36	ENSG00000159708	protein_coding	0.335283	1.83748e-18
DNPEP	ENSG00000123992	protein_coding	0.335257	1.84909e-18
LRRC14	ENSG00000160959	protein_coding	0.335221	1.86554e-18
NSUN5	ENSG00000130305	protein_coding	0.335	1.97e-18
CYP27A1	ENSG00000135929	protein_coding	0.334824	2.05727e-18
NR6A1	ENSG00000148200	protein_coding	0.334586	2.18133e-18
KANK1	ENSG00000107104	protein_coding	0.334555	2.19795e-18
EPHB3	ENSG00000182580	protein_coding	0.33446	2.24992e-18
MMAB	ENSG00000139428	protein_coding	0.334415	2.27508e-18
DHRSX	ENSG00000169084	protein_coding	0.334309	2.33495e-18
FOLR1	ENSG00000110195	protein_coding	0.334299	2.34061e-18
EXOC3	ENSG00000180104	protein_coding	0.334272	2.3565e-18
IFITM1	ENSG00000185885	protein_coding	0.334093	2.46225e-18
CHID1	ENSG00000177830	protein_coding	0.334056	2.48447e-18
NPEPL1	ENSG00000215440	protein_coding	0.33398	2.53145e-18
POR	ENSG00000127948	protein_coding	0.333959	2.54445e-18
ASL	ENSG00000126522	protein_coding	0.333871	2.59998e-18
MAPK13	ENSG00000156711	protein_coding	0.333726	2.69427e-18
SMIM29	ENSG00000186577	protein_coding	0.333382	2.93133e-18
ATG4B	ENSG00000168397	protein_coding	0.333371	2.93922e-18
TSSK6	ENSG00000178093	protein_coding	0.333152	3.10084e-18
TGIF2	ENSG00000118707	protein_coding	0.333056	3.17473e-18
GPAA1	ENSG00000197858	protein_coding	0.332974	3.23857e-18
IYD	ENSG00000009765	protein_coding	0.33295	3.25827e-18
EXOSC4	ENSG00000178896	protein_coding	0.332838	3.348e-18
GUCA2A	ENSG00000197273	protein_coding	0.332795	3.38355e-18
KAT2A	ENSG00000108773	protein_coding	0.332777	3.39897e-18
ENTPD6	ENSG00000197586	protein_coding	0.332735	3.43374e-18
RPUSD1	ENSG00000007376	protein_coding	0.332725	3.44212e-18
BICDL2	ENSG00000162069	protein_coding	0.332629	3.52327e-18
TTC38	ENSG00000075234	protein_coding	0.332578	3.56794e-18
NCBP2AS2	ENSG00000270170	protein_coding	0.332249	3.86574e-18
SLC25A6	ENSG00000169100	protein_coding	0.332186	3.92585e-18
FAM3A	ENSG00000071889	protein_coding	0.332077	4.03182e-18
CUTA	ENSG00000112514	protein_coding	0.331919	4.18992e-18
COMMD5	ENSG00000170619	protein_coding	0.331742	4.37451e-18
DHRS11	ENSG00000278535	protein_coding	0.331584	4.5458e-18
MAGEB17	ENSG00000182798	protein_coding	0.331424	4.72643e-18
VANGL2	ENSG00000162738	protein_coding	0.33137	4.78867e-18
TEKT5	ENSG00000153060	protein_coding	0.331173	5.02368e-18
CLDN15	ENSG00000106404	protein_coding	0.330997	5.24279e-18
AOAH	ENSG00000136250	protein_coding	0.330973	5.27322e-18
PABPC1L	ENSG00000101104	protein_coding	0.330928	5.33093e-18
RAB32	ENSG00000118508	protein_coding	0.330766	5.54498e-18
RNF44	ENSG00000146083	protein_coding	0.330736	5.5846e-18
ERP27	ENSG00000139055	protein_coding	0.330708	5.62273e-18
ARHGEF19	ENSG00000142632	protein_coding	0.330539	5.85879e-18
IGSF22	ENSG00000179057	protein_coding	0.330536	5.86298e-18
ALG1	ENSG00000033011	protein_coding	0.330286	6.22883e-18
LPIN3	ENSG00000132793	protein_coding	0.330223	6.3237e-18
HYAL2	ENSG00000068001	protein_coding	0.33016	6.4216e-18
PROSER1	ENSG00000120685	protein_coding	0.329865	6.89606e-18
SPPL2B	ENSG00000005206	protein_coding	0.32964	7.28099e-18
KCNK5	ENSG00000164626	protein_coding	0.329465	7.59563e-18
OXLD1	ENSG00000204237	protein_coding	0.329222	8.05483e-18
CYC1	ENSG00000179091	protein_coding	0.329088	8.31768e-18
CHST13	ENSG00000180767	protein_coding	0.328943	8.61472e-18
WDR4	ENSG00000160193	protein_coding	0.328915	8.67149e-18
CLRN3	ENSG00000180745	protein_coding	0.328878	8.75084e-18
ABT1	ENSG00000146109	protein_coding	0.328869	8.76873e-18
PPP1R3D	ENSG00000132825	protein_coding	0.328851	8.80818e-18
MACROD1	ENSG00000133315	protein_coding	0.328437	9.72859e-18
C3orf85	ENSG00000241224	protein_coding	0.328402	9.81217e-18
ME3	ENSG00000151376	protein_coding	0.328313	1.00245e-17
NADSYN1	ENSG00000172890	protein_coding	0.328282	1.00985e-17
EIF3B	ENSG00000106263	protein_coding	0.328144	1.04405e-17
GSPT2	ENSG00000189369	protein_coding	0.328042	1.06973e-17
PLEKHG5	ENSG00000171680	protein_coding	0.328	1.08077e-17
MANBAL	ENSG00000101363	protein_coding	0.327621	1.1836e-17
PIWIL2	ENSG00000197181	protein_coding	0.327543	1.2059e-17
SYCE1L	ENSG00000205078	protein_coding	0.327319	1.27226e-17
RFXANK	ENSG00000064490	protein_coding	0.327065	1.35216e-17
SMTN	ENSG00000183963	protein_coding	0.326994	1.37526e-17
TMEM255B	ENSG00000184497	protein_coding	0.326775	1.44911e-17
MRPL23	ENSG00000214026	protein_coding	0.326743	1.46028e-17
DMAC1	ENSG00000137038	protein_coding	0.32667	1.48578e-17
MSRB1	ENSG00000198736	protein_coding	0.326451	1.56561e-17
ZDHHC9	ENSG00000188706	protein_coding	0.32645	1.56611e-17
NANOS3	ENSG00000187556	protein_coding	0.326279	1.63143e-17
IL17RE	ENSG00000163701	protein_coding	0.325947	1.76554e-17
TRAP1	ENSG00000126602	protein_coding	0.325922	1.77598e-17
ASXL1	ENSG00000171456	protein_coding	0.325902	1.78447e-17
PGAP3	ENSG00000161395	protein_coding	0.325869	1.79848e-17
TSEN54	ENSG00000182173	protein_coding	0.325795	1.83071e-17
SYBU	ENSG00000147642	protein_coding	0.325794	1.83096e-17
PEX5	ENSG00000139197	protein_coding	0.325457	1.98397e-17
ACAA1	ENSG00000060971	protein_coding	0.325022	2.19979e-17
PYCR3	ENSG00000104524	protein_coding	0.324956	2.23445e-17
EEPD1	ENSG00000122547	protein_coding	0.324779	2.33071e-17
URM1	ENSG00000167118	protein_coding	0.324769	2.33602e-17
STK40	ENSG00000196182	protein_coding	0.32473	2.35799e-17
DCXR	ENSG00000169738	protein_coding	0.324621	2.41951e-17
FAM71E1	ENSG00000142530	protein_coding	0.324602	2.43057e-17
RRS1	ENSG00000179041	protein_coding	0.324392	2.55427e-17
IGSF8	ENSG00000162729	protein_coding	0.324363	2.57182e-17
PTCH1	ENSG00000185920	protein_coding	0.324311	2.60363e-17
METTL7B	ENSG00000170439	protein_coding	0.323921	2.85582e-17
DGKZ	ENSG00000149091	protein_coding	0.323903	2.86797e-17
MCRIP1	ENSG00000225663	protein_coding	0.323722	2.99346e-17
SUCLG1	ENSG00000163541	protein_coding	0.323548	3.11845e-17
SPG7	ENSG00000197912	protein_coding	0.323546	3.12045e-17
AGMAT	ENSG00000116771	protein_coding	0.323524	3.1365e-17
FABP1	ENSG00000163586	protein_coding	0.323322	3.28939e-17
SPATC1L	ENSG00000160284	protein_coding	0.323196	3.38893e-17
WDR46	ENSG00000227057	protein_coding	0.32298	3.56574e-17
SPOUT1	ENSG00000198917	protein_coding	0.322972	3.57269e-17
LAS1L	ENSG00000001497	protein_coding	0.32268	3.82645e-17
IL34	ENSG00000157368	protein_coding	0.322582	3.91566e-17
CPN1	ENSG00000120054	protein_coding	0.32246	4.03014e-17
F7	ENSG00000057593	protein_coding	0.322288	4.19662e-17
TRMT12	ENSG00000183665	protein_coding	0.322256	4.22742e-17
CTNNBL1	ENSG00000132792	protein_coding	0.322243	4.24104e-17
DHCR7	ENSG00000172893	protein_coding	0.322008	4.48132e-17
ETV4	ENSG00000175832	protein_coding	0.321933	4.56115e-17
PGAP6	ENSG00000129925	protein_coding	0.321933	4.56119e-17
NOL4L	ENSG00000197183	protein_coding	0.321916	4.57901e-17
NHP2	ENSG00000145912	protein_coding	0.321796	4.70948e-17
NUBP2	ENSG00000095906	protein_coding	0.321796	4.71018e-17
AOC1	ENSG00000002726	protein_coding	0.321542	4.99872e-17
SLC7A5	ENSG00000103257	protein_coding	0.321531	5.01136e-17
EPDR1	ENSG00000086289	protein_coding	0.32135	5.22839e-17
EEF2KMT	ENSG00000118894	protein_coding	0.321344	5.23663e-17
STARD10	ENSG00000214530	protein_coding	0.321307	5.28238e-17
SERP2	ENSG00000151778	protein_coding	0.321189	5.43012e-17
NDUFB11	ENSG00000147123	protein_coding	0.321122	5.51556e-17
SLC1A7	ENSG00000162383	protein_coding	0.321103	5.54025e-17
MLST8	ENSG00000167965	protein_coding	0.321027	5.63933e-17
TKFC	ENSG00000149476	protein_coding	0.321021	5.64797e-17
LIN7B	ENSG00000104863	protein_coding	0.320966	5.7209e-17
GRK2	ENSG00000173020	protein_coding	0.32092	5.78305e-17
PRR5	ENSG00000186654	protein_coding	0.320884	5.83189e-17
RNLS	ENSG00000184719	protein_coding	0.320829	5.90624e-17
VIPR1	ENSG00000114812	protein_coding	0.320825	5.91236e-17
A1CF	ENSG00000148584	protein_coding	0.32073	6.04451e-17
SERPINA7	ENSG00000123561	protein_coding	0.320633	6.183e-17
ADSL	ENSG00000239900	protein_coding	0.320566	6.28173e-17
ARFRP1	ENSG00000101246	protein_coding	0.320475	6.41641e-17
WDR13	ENSG00000101940	protein_coding	0.320446	6.46005e-17
PLAGL1	ENSG00000118495	protein_coding	0.320376	6.56532e-17
ELOB	ENSG00000103363	protein_coding	0.320288	6.70217e-17
HDHD3	ENSG00000119431	protein_coding	0.320003	7.16243e-17
NEK3	ENSG00000136098	protein_coding	0.319777	7.54883e-17
COA3	ENSG00000183978	protein_coding	0.319536	7.98476e-17
SEPHS1	ENSG00000086475	protein_coding	0.319439	8.16683e-17
TPST2	ENSG00000128294	protein_coding	0.319314	8.40872e-17
GRAMD1A	ENSG00000089351	protein_coding	0.319224	8.58493e-17
CHCHD2	ENSG00000106153	protein_coding	0.319131	8.77362e-17
SYS1	ENSG00000204070	protein_coding	0.318957	9.13517e-17
C11orf95	ENSG00000188070	protein_coding	0.318925	9.20232e-17
BRAT1	ENSG00000106009	protein_coding	0.318884	9.28963e-17
OGG1	ENSG00000114026	protein_coding	0.318784	9.50875e-17
CAMSAP3	ENSG00000076826	protein_coding	0.318775	9.52857e-17
C7orf50	ENSG00000146540	protein_coding	0.318643	9.82481e-17
ZC4H2	ENSG00000126970	protein_coding	0.318562	1.00108e-16
ATP6V1FNB	ENSG00000272899	protein_coding	0.318496	1.0166e-16
BLOC1S4	ENSG00000186222	protein_coding	0.318466	1.02367e-16
OPLAH	ENSG00000178814	protein_coding	0.318394	1.04078e-16
AP4M1	ENSG00000221838	protein_coding	0.317941	1.15572e-16
ATP7B	ENSG00000123191	protein_coding	0.317894	1.16835e-16
SWSAP1	ENSG00000173928	protein_coding	0.317735	1.2123e-16
DUSP8	ENSG00000184545	protein_coding	0.31765	1.23627e-16
TBCB	ENSG00000105254	protein_coding	0.317546	1.26629e-16
RXFP4	ENSG00000173080	protein_coding	0.317536	1.26911e-16
TSC2	ENSG00000103197	protein_coding	0.317467	1.28948e-16
VAPB	ENSG00000124164	protein_coding	0.31744	1.29766e-16
SP6	ENSG00000189120	protein_coding	0.317323	1.33315e-16
IPO5	ENSG00000065150	protein_coding	0.317253	1.3547e-16
SMARCD2	ENSG00000108604	protein_coding	0.317231	1.36175e-16
CCDC167	ENSG00000198937	protein_coding	0.317216	1.36644e-16
NCOA5	ENSG00000124160	protein_coding	0.317	1.43626e-16
ZFAND2B	ENSG00000158552	protein_coding	0.316795	1.50561e-16
TTPA	ENSG00000137561	protein_coding	0.316715	1.5336e-16
ATP10B	ENSG00000118322	protein_coding	0.316678	1.54671e-16
SPACA3	ENSG00000141316	protein_coding	0.31644	1.63379e-16
RASL11A	ENSG00000122035	protein_coding	0.31644	1.6338e-16
EOLA1	ENSG00000197620	protein_coding	0.31644	1.63381e-16
TPRA1	ENSG00000163870	protein_coding	0.316188	1.73108e-16
AGXT	ENSG00000172482	protein_coding	0.316182	1.73343e-16
ALG3	ENSG00000214160	protein_coding	0.316122	1.75741e-16
SEPHS2	ENSG00000179918	protein_coding	0.316112	1.76152e-16
GGT1	ENSG00000100031	protein_coding	0.315972	1.81903e-16
DLL4	ENSG00000128917	protein_coding	0.31583	1.87921e-16
PATZ1	ENSG00000100105	protein_coding	0.315665	1.9516e-16
LIME1	ENSG00000203896	protein_coding	0.315428	2.06056e-16
EPB41L4B	ENSG00000095203	protein_coding	0.31513	2.20611e-16
FUNDC2	ENSG00000165775	protein_coding	0.314893	2.32916e-16
CCT7	ENSG00000135624	protein_coding	0.314872	2.34033e-16
NDUFV1	ENSG00000167792	protein_coding	0.314695	2.43653e-16
ZNF703	ENSG00000183779	protein_coding	0.314659	2.45719e-16
ZNF335	ENSG00000198026	protein_coding	0.314658	2.45769e-16
TMTC4	ENSG00000125247	protein_coding	0.314652	2.46057e-16
ATP5F1E	ENSG00000124172	protein_coding	0.31438	2.61862e-16
SLC25A10	ENSG00000183048	protein_coding	0.314201	2.72778e-16
LRRC10B	ENSG00000204950	protein_coding	0.31419	2.73456e-16
CES1	ENSG00000198848	protein_coding	0.314111	2.78392e-16
SLC38A3	ENSG00000188338	protein_coding	0.313978	2.86945e-16
ACE2	ENSG00000130234	protein_coding	0.313968	2.87644e-16
STK25	ENSG00000115694	protein_coding	0.313851	2.95363e-16
FIS1	ENSG00000214253	protein_coding	0.313817	2.97669e-16
CISD3	ENSG00000277972	protein_coding	0.3137	3.05722e-16
GLOD5	ENSG00000171433	protein_coding	0.313568	3.15019e-16
ZGPAT	ENSG00000197114	protein_coding	0.313515	3.18832e-16
UXT	ENSG00000126756	protein_coding	0.313454	3.23314e-16
SLC6A6	ENSG00000131389	protein_coding	0.313407	3.26748e-16
SLC41A3	ENSG00000114544	protein_coding	0.313031	3.55918e-16
ANAPC11	ENSG00000141552	protein_coding	0.312988	3.59423e-16
TINAG	ENSG00000137251	protein_coding	0.312637	3.89186e-16
SERPINF2	ENSG00000167711	protein_coding	0.312121	4.37413e-16
IGBP1	ENSG00000089289	protein_coding	0.312042	4.453e-16
SMOC2	ENSG00000112562	protein_coding	0.311969	4.52698e-16
CHN2	ENSG00000106069	protein_coding	0.311953	4.5433e-16
RPS9	ENSG00000170889	protein_coding	0.311937	4.56006e-16
CCDC61	ENSG00000104983	protein_coding	0.311546	4.98039e-16
HILPDA	ENSG00000135245	protein_coding	0.311485	5.04945e-16
YDJC	ENSG00000161179	protein_coding	0.311342	5.21492e-16
SND1	ENSG00000197157	protein_coding	0.311226	5.35369e-16
TAF4	ENSG00000130699	protein_coding	0.311196	5.38946e-16
RAB20	ENSG00000139832	protein_coding	0.311112	5.4921e-16
GPS1	ENSG00000169727	protein_coding	0.311046	5.57525e-16
YTHDF1	ENSG00000149658	protein_coding	0.31084	5.84009e-16
DNAAF5	ENSG00000164818	protein_coding	0.310694	6.03468e-16
FGF19	ENSG00000162344	protein_coding	0.310606	6.15581e-16
DCTPP1	ENSG00000179958	protein_coding	0.310561	6.21794e-16
PDF	ENSG00000258429	protein_coding	0.310407	6.43668e-16
HGH1	ENSG00000235173	protein_coding	0.310387	6.46614e-16
MRM1	ENSG00000278619	protein_coding	0.31035	6.52044e-16
TUBA4A	ENSG00000127824	protein_coding	0.310213	6.72328e-16
SLC5A9	ENSG00000117834	protein_coding	0.310208	6.73117e-16
TMPRSS13	ENSG00000137747	protein_coding	0.310026	7.01129e-16
PNPLA4	ENSG00000006757	protein_coding	0.309983	7.08017e-16
ZNF576	ENSG00000124444	protein_coding	0.309855	7.28565e-16
GCDH	ENSG00000105607	protein_coding	0.309854	7.28672e-16
TYSND1	ENSG00000156521	protein_coding	0.309848	7.29722e-16
EIF3F	ENSG00000175390	protein_coding	0.309844	7.30354e-16
PRR9	ENSG00000203783	protein_coding	0.309779	7.41124e-16
TMEM63C	ENSG00000165548	protein_coding	0.309752	7.4564e-16
GLCE	ENSG00000138604	protein_coding	0.309698	7.54596e-16
USE1	ENSG00000053501	protein_coding	0.309639	7.64723e-16
MNX1	ENSG00000130675	protein_coding	0.309594	7.72483e-16
SP5	ENSG00000204335	protein_coding	0.309515	7.86234e-16
SLC9A8	ENSG00000197818	protein_coding	0.309293	8.26393e-16
CYP39A1	ENSG00000146233	protein_coding	0.309253	8.33681e-16
CD320	ENSG00000167775	protein_coding	0.30911	8.60837e-16
NECTIN1	ENSG00000110400	protein_coding	0.309087	8.65177e-16
PAFAH1B3	ENSG00000079462	protein_coding	0.309071	8.68364e-16
TEX45	ENSG00000198723	protein_coding	0.308828	9.1682e-16
MRPS34	ENSG00000074071	protein_coding	0.308744	9.3412e-16
RABL6	ENSG00000196642	protein_coding	0.308687	9.46158e-16
SRC	ENSG00000197122	protein_coding	0.30863	9.58202e-16
SLC12A9	ENSG00000146828	protein_coding	0.308499	9.86769e-16
TNFRSF25	ENSG00000215788	protein_coding	0.308405	1.00765e-15
APRT	ENSG00000198931	protein_coding	0.308188	1.05762e-15
MRPL36	ENSG00000171421	protein_coding	0.308116	1.07464e-15
ALDH1B1	ENSG00000137124	protein_coding	0.308044	1.09188e-15
TRMT1	ENSG00000104907	protein_coding	0.307979	1.10792e-15
POLR1D	ENSG00000186184	protein_coding	0.307922	1.12198e-15
DNTTIP1	ENSG00000101457	protein_coding	0.307509	1.22996e-15
GTF3A	ENSG00000122034	protein_coding	0.307321	1.28256e-15
CPNE2	ENSG00000140848	protein_coding	0.307103	1.34602e-15
C11orf49	ENSG00000149179	protein_coding	0.307002	1.37649e-15
PDHA1	ENSG00000131828	protein_coding	0.306948	1.39322e-15
HKDC1	ENSG00000156510	protein_coding	0.306787	1.4436e-15
SLC7A4	ENSG00000099960	protein_coding	0.306766	1.45041e-15
SMDT1	ENSG00000183172	protein_coding	0.306754	1.45431e-15
TAZ	ENSG00000102125	protein_coding	0.306727	1.46304e-15
AIP	ENSG00000110711	protein_coding	0.306691	1.47458e-15
PREB	ENSG00000138073	protein_coding	0.306645	1.48991e-15
CORO1B	ENSG00000172725	protein_coding	0.306607	1.50256e-15
CCDC88B	ENSG00000168071	protein_coding	0.306175	1.65313e-15
CLDN4	ENSG00000189143	protein_coding	0.305927	1.74632e-15
TUSC2	ENSG00000114383	protein_coding	0.305911	1.75247e-15
BMP7	ENSG00000101144	protein_coding	0.30587	1.76847e-15
ACSF3	ENSG00000176715	protein_coding	0.305804	1.79421e-15
AREG	ENSG00000109321	protein_coding	0.305616	1.8704e-15
MYL6B	ENSG00000196465	protein_coding	0.305593	1.87981e-15
ASCL5	ENSG00000232237	protein_coding	0.305284	2.01222e-15
CDC34	ENSG00000099804	protein_coding	0.305237	2.03336e-15
MED30	ENSG00000164758	protein_coding	0.305188	2.05526e-15
DKC1	ENSG00000130826	protein_coding	0.30512	2.0864e-15
GOLGA7B	ENSG00000155265	protein_coding	0.305083	2.10351e-15
SLC25A1	ENSG00000100075	protein_coding	0.305007	2.13885e-15
RASL10B	ENSG00000270885	protein_coding	0.304994	2.14501e-15
PPDPF	ENSG00000125534	protein_coding	0.304986	2.14879e-15
TMEM101	ENSG00000091947	protein_coding	0.304975	2.15428e-15
TG	ENSG00000042832	protein_coding	0.304325	2.48476e-15
TIMM13	ENSG00000099800	protein_coding	0.30426	2.52071e-15
PRSS23	ENSG00000150687	protein_coding	0.304208	2.54927e-15
IMP4	ENSG00000136718	protein_coding	0.30418	2.56523e-15
TMEM189	ENSG00000240849	protein_coding	0.304167	2.57278e-15
SHROOM4	ENSG00000158352	protein_coding	0.304151	2.58174e-15
NEU1	ENSG00000204386	protein_coding	0.304077	2.62353e-15
PITX2	ENSG00000164093	protein_coding	0.304016	2.65938e-15
CTNNB1	ENSG00000168036	protein_coding	0.303941	2.70318e-15
SRM	ENSG00000116649	protein_coding	0.303781	2.79977e-15
PPFIA3	ENSG00000177380	protein_coding	0.303721	2.83646e-15
NT5C3B	ENSG00000141698	protein_coding	0.303388	3.05126e-15
SLC7A6	ENSG00000103064	protein_coding	0.303072	3.26951e-15
RPS2	ENSG00000140988	protein_coding	0.303071	3.26981e-15
TEX43	ENSG00000196900	protein_coding	0.302932	3.37048e-15
TMEM184A	ENSG00000164855	protein_coding	0.302768	3.49397e-15
MYCL	ENSG00000116990	protein_coding	0.302653	3.5827e-15
NTMT1	ENSG00000148335	protein_coding	0.302573	3.64525e-15
FABP6	ENSG00000170231	protein_coding	0.302491	3.71149e-15
UBL4A	ENSG00000102178	protein_coding	0.302464	3.73314e-15
GPR153	ENSG00000158292	protein_coding	0.302444	3.74929e-15
TRMT2A	ENSG00000099899	protein_coding	0.302201	3.95326e-15
HSD17B8	ENSG00000204228	protein_coding	0.3022	3.95419e-15
JUP	ENSG00000173801	protein_coding	0.302149	3.99812e-15
MRGBP	ENSG00000101189	protein_coding	0.302098	4.04249e-15
CHMP1A	ENSG00000131165	protein_coding	0.302038	4.09588e-15
RASSF10	ENSG00000189431	protein_coding	0.301997	4.13248e-15
SLC25A15	ENSG00000102743	protein_coding	0.301932	4.19185e-15
FUT7	ENSG00000180549	protein_coding	0.301898	4.22228e-15
NAA10	ENSG00000102030	protein_coding	0.301884	4.23534e-15
HOGA1	ENSG00000241935	protein_coding	0.301879	4.23981e-15
DGKD	ENSG00000077044	protein_coding	0.301862	4.25558e-15
TMEM187	ENSG00000177854	protein_coding	0.301774	4.33818e-15
DTX2	ENSG00000091073	protein_coding	0.301706	4.40309e-15
PRSS56	ENSG00000237412	protein_coding	0.30164	4.46586e-15
RAB24	ENSG00000169228	protein_coding	0.301636	4.46968e-15
UTP4	ENSG00000141076	protein_coding	0.301588	4.51691e-15
RPLP2	ENSG00000177600	protein_coding	0.301541	4.56309e-15
MMP24OS	ENSG00000126005	protein_coding	0.30148	4.62422e-15
MDH2	ENSG00000146701	protein_coding	0.301384	4.72197e-15
GAS2	ENSG00000148935	protein_coding	0.301373	4.7329e-15
INTS1	ENSG00000164880	protein_coding	0.301316	4.79124e-15
SELENOH	ENSG00000211450	protein_coding	0.301191	4.92359e-15
PRELID1	ENSG00000169230	protein_coding	0.301183	4.93209e-15
SMG5	ENSG00000198952	protein_coding	0.30102	5.10973e-15
MVD	ENSG00000167508	protein_coding	0.300761	5.40462e-15
ZNF598	ENSG00000167962	protein_coding	0.300673	5.5087e-15
GSE1	ENSG00000131149	protein_coding	0.300343	5.91503e-15
NLE1	ENSG00000073536	protein_coding	0.300341	5.91824e-15
PLA2G4E	ENSG00000188089	protein_coding	0.299936	6.45906e-15
STAP2	ENSG00000178078	protein_coding	0.29979	6.66592e-15
GOLT1A	ENSG00000174567	protein_coding	0.299683	6.82123e-15
NICN1	ENSG00000145029	protein_coding	0.299523	7.06019e-15
SF3B5	ENSG00000169976	protein_coding	0.299454	7.16664e-15
G6PC3	ENSG00000141349	protein_coding	0.29939	7.26644e-15
AL662899.1	ENSG00000204422	protein_coding	0.299113	7.71169e-15
DPP3	ENSG00000254986	protein_coding	0.298998	7.90514e-15
PLCG1	ENSG00000124181	protein_coding	0.298967	7.9577e-15
GBX2	ENSG00000168505	protein_coding	0.298931	8.01942e-15
PPP1R35	ENSG00000160813	protein_coding	0.298911	8.05459e-15
ZNRD1	ENSG00000066379	protein_coding	0.298664	8.49414e-15
DOCK6	ENSG00000130158	protein_coding	0.298488	8.82175e-15
EIF3D	ENSG00000100353	protein_coding	0.298315	9.1544e-15
PLA2G6	ENSG00000184381	protein_coding	0.298304	9.17677e-15
EEF1D	ENSG00000104529	protein_coding	0.297853	1.01067e-14
PPP2R1A	ENSG00000105568	protein_coding	0.297817	1.01845e-14
BAP1	ENSG00000163930	protein_coding	0.297668	1.05146e-14
PLEKHG4	ENSG00000196155	protein_coding	0.297372	1.12024e-14
ARL11	ENSG00000152213	protein_coding	0.297311	1.13488e-14
ABCC2	ENSG00000023839	protein_coding	0.297187	1.16532e-14
FBL	ENSG00000105202	protein_coding	0.296982	1.21737e-14
SLC29A1	ENSG00000112759	protein_coding	0.296952	1.22516e-14
RPS14	ENSG00000164587	protein_coding	0.296936	1.22946e-14
DHX35	ENSG00000101452	protein_coding	0.296801	1.26526e-14
SSNA1	ENSG00000176101	protein_coding	0.2967	1.29296e-14
C4orf48	ENSG00000243449	protein_coding	0.296684	1.29746e-14
HENMT1	ENSG00000162639	protein_coding	0.296513	1.3455e-14
TST	ENSG00000128311	protein_coding	0.296455	1.36227e-14
GRHL3	ENSG00000158055	protein_coding	0.296453	1.36273e-14
CIAO1	ENSG00000144021	protein_coding	0.296306	1.40603e-14
HMOX2	ENSG00000103415	protein_coding	0.296296	1.40918e-14
AKIRIN2	ENSG00000135334	protein_coding	0.296216	1.43311e-14
ABCC10	ENSG00000124574	protein_coding	0.296094	1.47086e-14
VWA1	ENSG00000179403	protein_coding	0.295758	1.57979e-14
PHPT1	ENSG00000054148	protein_coding	0.29573	1.58902e-14
HSD11B1L	ENSG00000167733	protein_coding	0.295297	1.74223e-14
CALML3	ENSG00000178363	protein_coding	0.29528	1.74822e-14
MIIP	ENSG00000116691	protein_coding	0.295247	1.76058e-14
STRA6	ENSG00000137868	protein_coding	0.295049	1.83611e-14
ANAPC15	ENSG00000110200	protein_coding	0.29502	1.84722e-14
CALCA	ENSG00000110680	protein_coding	0.294836	1.92062e-14
ARFGAP2	ENSG00000149182	protein_coding	0.294614	2.01305e-14
WIF1	ENSG00000156076	protein_coding	0.294404	2.10438e-14
CELF3	ENSG00000159409	protein_coding	0.294293	2.15409e-14
EIF2S2	ENSG00000125977	protein_coding	0.294283	2.15862e-14
SHD	ENSG00000105251	protein_coding	0.294248	2.17474e-14
DNASE1	ENSG00000213918	protein_coding	0.294205	2.1947e-14
CARM1	ENSG00000142453	protein_coding	0.294179	2.2068e-14
POLRMT	ENSG00000099821	protein_coding	0.293902	2.33933e-14
COX4I1	ENSG00000131143	protein_coding	0.293876	2.35244e-14
REEP1	ENSG00000068615	protein_coding	0.293756	2.41228e-14
ECE2	ENSG00000145194	protein_coding	0.293744	2.41848e-14
EPS8L2	ENSG00000177106	protein_coding	0.29365	2.46707e-14
TMEM175	ENSG00000127419	protein_coding	0.293417	2.59126e-14
POLR2G	ENSG00000168002	protein_coding	0.293333	2.63717e-14
TMEM211	ENSG00000206069	protein_coding	0.29329	2.66118e-14
EVX1	ENSG00000106038	protein_coding	0.293286	2.66361e-14
MAZ	ENSG00000103495	protein_coding	0.293208	2.70769e-14
AMOT	ENSG00000126016	protein_coding	0.293113	2.76186e-14
STK11	ENSG00000118046	protein_coding	0.293101	2.76895e-14
PAH	ENSG00000171759	protein_coding	0.29309	2.77541e-14
PUS1	ENSG00000177192	protein_coding	0.293082	2.78002e-14
ACSS2	ENSG00000131069	protein_coding	0.29302	2.81649e-14
DCAF15	ENSG00000132017	protein_coding	0.293016	2.81914e-14
UCHL3	ENSG00000118939	protein_coding	0.293009	2.82276e-14
AMPD2	ENSG00000116337	protein_coding	0.292846	2.92151e-14
CD151	ENSG00000177697	protein_coding	0.29271	3.00602e-14
DDX56	ENSG00000136271	protein_coding	0.29266	3.03755e-14
SMPD2	ENSG00000135587	protein_coding	0.292455	3.17078e-14
MT3	ENSG00000087250	protein_coding	0.292442	3.17966e-14
TMEM161A	ENSG00000064545	protein_coding	0.292304	3.27297e-14
SSR4	ENSG00000180879	protein_coding	0.292294	3.27965e-14
DDX28	ENSG00000182810	protein_coding	0.292199	3.34579e-14
MED24	ENSG00000008838	protein_coding	0.291893	3.56655e-14
ARRDC1	ENSG00000197070	protein_coding	0.291825	3.61786e-14
COG4	ENSG00000103051	protein_coding	0.291693	3.71924e-14
DNPH1	ENSG00000112667	protein_coding	0.291479	3.8894e-14
EEF1AKNMT	ENSG00000010165	protein_coding	0.291471	3.89597e-14
GLB1	ENSG00000170266	protein_coding	0.29143	3.92949e-14
ATF6B	ENSG00000213676	protein_coding	0.29138	3.97051e-14
ATP6V1C2	ENSG00000143882	protein_coding	0.291372	3.97669e-14
TSPAN33	ENSG00000158457	protein_coding	0.291346	3.99862e-14
MRPL38	ENSG00000204316	protein_coding	0.291306	4.03254e-14
SERPINA6	ENSG00000170099	protein_coding	0.291285	4.0497e-14
SLC26A6	ENSG00000225697	protein_coding	0.291269	4.06332e-14
C20orf27	ENSG00000101220	protein_coding	0.29113	4.18321e-14
COPS6	ENSG00000168090	protein_coding	0.290632	4.63983e-14
HSD3B1	ENSG00000203857	protein_coding	0.290605	4.66647e-14
EIF2B4	ENSG00000115211	protein_coding	0.290415	4.85433e-14
CEMIP	ENSG00000103888	protein_coding	0.290324	4.94708e-14
NUTF2	ENSG00000102898	protein_coding	0.290161	5.11734e-14
ALKBH7	ENSG00000125652	protein_coding	0.290076	5.20892e-14
PCBP4	ENSG00000090097	protein_coding	0.289908	5.39368e-14
PTDSS1	ENSG00000156471	protein_coding	0.28986	5.44699e-14
RPLP1	ENSG00000137818	protein_coding	0.289765	5.55617e-14
FAU	ENSG00000149806	protein_coding	0.289739	5.58556e-14
ARMC2	ENSG00000118690	protein_coding	0.289622	5.72325e-14
SYN3	ENSG00000185666	protein_coding	0.289572	5.783e-14
TESMIN	ENSG00000132749	protein_coding	0.289394	5.99966e-14
CLN3	ENSG00000188603	protein_coding	0.289388	6.00769e-14
MIPEP	ENSG00000027001	protein_coding	0.289322	6.08941e-14
POLR2J	ENSG00000005075	protein_coding	0.289247	6.18559e-14
E2F1	ENSG00000101412	protein_coding	0.289196	6.25106e-14
GPSM2	ENSG00000121957	protein_coding	0.289186	6.26409e-14
CD81	ENSG00000110651	protein_coding	0.289159	6.29812e-14
COMTD1	ENSG00000165644	protein_coding	0.289129	6.33748e-14
SHH	ENSG00000164690	protein_coding	0.28912	6.34933e-14
TKT	ENSG00000163931	protein_coding	0.289099	6.377e-14
EPCAM	ENSG00000119888	protein_coding	0.289089	6.39066e-14
ZBED1	ENSG00000214717	protein_coding	0.288972	6.54728e-14
RPS6	ENSG00000137154	protein_coding	0.288971	6.54811e-14
RECQL4	ENSG00000160957	protein_coding	0.288814	6.76455e-14
ARF5	ENSG00000004059	protein_coding	0.288797	6.78812e-14
DEFA5	ENSG00000164816	protein_coding	0.288786	6.80284e-14
C7orf26	ENSG00000146576	protein_coding	0.288561	7.12771e-14
CDHR2	ENSG00000074276	protein_coding	0.288497	7.22124e-14
THOC6	ENSG00000131652	protein_coding	0.288462	7.27354e-14
LRP5	ENSG00000162337	protein_coding	0.288319	7.49195e-14
ADCY3	ENSG00000138031	protein_coding	0.288261	7.58119e-14
TOM1	ENSG00000100284	protein_coding	0.288236	7.62176e-14
ARHGAP39	ENSG00000147799	protein_coding	0.288029	7.95299e-14
PMEPA1	ENSG00000124225	protein_coding	0.288013	7.97922e-14
RPS4X	ENSG00000198034	protein_coding	0.287994	8.01098e-14
COMMD6	ENSG00000188243	protein_coding	0.287987	8.02285e-14
NAT2	ENSG00000156006	protein_coding	0.287949	8.08478e-14
PLEKHB1	ENSG00000021300	protein_coding	0.287944	8.0931e-14
GPR157	ENSG00000180758	protein_coding	0.287895	8.17508e-14
SSBP4	ENSG00000130511	protein_coding	0.28786	8.23485e-14
MRPS12	ENSG00000128626	protein_coding	0.28775	8.42245e-14
RPL3	ENSG00000100316	protein_coding	0.287728	8.46222e-14
MIF	ENSG00000240972	protein_coding	0.28772	8.47589e-14
NDUFB7	ENSG00000099795	protein_coding	0.287675	8.55362e-14
BBS5	ENSG00000163093	protein_coding	0.287651	8.59599e-14
SLC7A8	ENSG00000092068	protein_coding	0.287629	8.63476e-14
PFKL	ENSG00000141959	protein_coding	0.287624	8.64472e-14
SPRYD7	ENSG00000123178	protein_coding	0.287582	8.71921e-14
MRPL12	ENSG00000262814	protein_coding	0.28758	8.72221e-14
FAM151A	ENSG00000162391	protein_coding	0.287539	8.79626e-14
NELFA	ENSG00000185049	protein_coding	0.287492	8.88239e-14
RPS6KA6	ENSG00000072133	protein_coding	0.287412	9.02918e-14
SLC19A1	ENSG00000173638	protein_coding	0.287384	9.08088e-14
DHRS3	ENSG00000162496	protein_coding	0.287355	9.13574e-14
GRM8	ENSG00000179603	protein_coding	0.287243	9.3485e-14
SAMD10	ENSG00000130590	protein_coding	0.287012	9.80143e-14
SMAGP	ENSG00000170545	protein_coding	0.286946	9.93612e-14
EREG	ENSG00000124882	protein_coding	0.286916	9.99628e-14
MICOS13	ENSG00000174917	protein_coding	0.286844	1.01465e-13
ARVCF	ENSG00000099889	protein_coding	0.286836	1.01628e-13
NGEF	ENSG00000066248	protein_coding	0.286821	1.01936e-13
NMNAT3	ENSG00000163864	protein_coding	0.286624	1.06137e-13
NOP16	ENSG00000048162	protein_coding	0.286565	1.07416e-13
TM7SF2	ENSG00000149809	protein_coding	0.286508	1.08683e-13
TALDO1	ENSG00000177156	protein_coding	0.286505	1.0875e-13
ZNF282	ENSG00000170265	protein_coding	0.28636	1.12014e-13
CDH17	ENSG00000079112	protein_coding	0.28625	1.14575e-13
SEMA5A	ENSG00000112902	protein_coding	0.28609	1.18375e-13
MINDY1	ENSG00000143409	protein_coding	0.285997	1.20658e-13
SLC1A5	ENSG00000105281	protein_coding	0.285907	1.22896e-13
SMAP1	ENSG00000112305	protein_coding	0.285733	1.27324e-13
EBPL	ENSG00000123179	protein_coding	0.285722	1.27615e-13
MAF1	ENSG00000179632	protein_coding	0.285601	1.30811e-13
TMEM120A	ENSG00000189077	protein_coding	0.285542	1.32394e-13
RNASEH2C	ENSG00000172922	protein_coding	0.285531	1.32686e-13
MPV17	ENSG00000115204	protein_coding	0.285418	1.35797e-13
RPS6KB2	ENSG00000175634	protein_coding	0.285386	1.36674e-13
CAPN10	ENSG00000142330	protein_coding	0.28537	1.37111e-13
DHX37	ENSG00000150990	protein_coding	0.285362	1.37357e-13
TUFM	ENSG00000178952	protein_coding	0.2852	1.41948e-13
FBXL12	ENSG00000127452	protein_coding	0.285186	1.42344e-13
SLC52A3	ENSG00000101276	protein_coding	0.285145	1.43563e-13
EOLA2	ENSG00000197021	protein_coding	0.285137	1.43789e-13
LRRC75B	ENSG00000178026	protein_coding	0.285082	1.45414e-13
RPS5	ENSG00000083845	protein_coding	0.285056	1.46176e-13
PCK2	ENSG00000100889	protein_coding	0.28468	1.57787e-13
APMAP	ENSG00000101474	protein_coding	0.284572	1.61299e-13
NUDCD3	ENSG00000015676	protein_coding	0.284319	1.69784e-13
KRT83	ENSG00000170523	protein_coding	0.284126	1.76552e-13
TSSC4	ENSG00000184281	protein_coding	0.283784	1.8924e-13
PC	ENSG00000173599	protein_coding	0.2836	1.96408e-13
TGFBI	ENSG00000120708	protein_coding	0.283558	1.98083e-13
E4F1	ENSG00000167967	protein_coding	0.283553	1.98312e-13
TUT1	ENSG00000149016	protein_coding	0.28353	1.99223e-13
ATAD3A	ENSG00000197785	protein_coding	0.283515	1.99825e-13
ZNF414	ENSG00000133250	protein_coding	0.283423	2.03572e-13
ZNF358	ENSG00000198816	protein_coding	0.283271	2.09939e-13
POLR2H	ENSG00000163882	protein_coding	0.283216	2.12267e-13
MAPKAPK3	ENSG00000114738	protein_coding	0.28312	2.16415e-13
ALG5	ENSG00000120697	protein_coding	0.28311	2.1687e-13
TRIB3	ENSG00000101255	protein_coding	0.28307	2.18637e-13
SLC23A1	ENSG00000170482	protein_coding	0.283005	2.21519e-13
EIF3H	ENSG00000147677	protein_coding	0.282991	2.22154e-13
NOP53	ENSG00000105373	protein_coding	0.282521	2.44243e-13
MCRS1	ENSG00000187778	protein_coding	0.282408	2.4984e-13
RRP1	ENSG00000160214	protein_coding	0.282394	2.50545e-13
RAB15	ENSG00000139998	protein_coding	0.282349	2.52833e-13
PCDH19	ENSG00000165194	protein_coding	0.282333	2.53634e-13
MUC20	ENSG00000176945	protein_coding	0.282221	2.59433e-13
SH3BP1	ENSG00000100092	protein_coding	0.282117	2.64907e-13
POLR2I	ENSG00000105258	protein_coding	0.28203	2.69608e-13
ATP1A1	ENSG00000163399	protein_coding	0.282015	2.70389e-13
OSBPL2	ENSG00000130703	protein_coding	0.281942	2.74397e-13
EIF3G	ENSG00000130811	protein_coding	0.281898	2.76836e-13
EHMT2	ENSG00000204371	protein_coding	0.281835	2.80356e-13
MCRIP2	ENSG00000172366	protein_coding	0.281671	2.89728e-13
GTPBP6	ENSG00000178605	protein_coding	0.281485	3.00769e-13
TGM3	ENSG00000125780	protein_coding	0.281171	3.20335e-13
PCP4	ENSG00000183036	protein_coding	0.280969	3.33537e-13
ZNF76	ENSG00000065029	protein_coding	0.280863	3.40659e-13
TAF6L	ENSG00000162227	protein_coding	0.280845	3.41918e-13
ZNHIT2	ENSG00000174276	protein_coding	0.280736	3.49429e-13
DDX41	ENSG00000183258	protein_coding	0.280736	3.49447e-13
IRAK1	ENSG00000184216	protein_coding	0.280684	3.53079e-13
HGS	ENSG00000185359	protein_coding	0.280631	3.56837e-13
MAGED2	ENSG00000102316	protein_coding	0.280593	3.59561e-13
RAB17	ENSG00000124839	protein_coding	0.280564	3.61696e-13
TREH	ENSG00000118094	protein_coding	0.280489	3.67112e-13
UNC5CL	ENSG00000124602	protein_coding	0.280096	3.97083e-13
AUP1	ENSG00000115307	protein_coding	0.280072	3.99028e-13
PDSS1	ENSG00000148459	protein_coding	0.280065	3.9957e-13
EPN1	ENSG00000063245	protein_coding	0.279939	4.09765e-13
CBLN1	ENSG00000102924	protein_coding	0.279896	4.13297e-13
AIMP2	ENSG00000106305	protein_coding	0.27984	4.17894e-13
NOD2	ENSG00000167207	protein_coding	0.27983	4.18743e-13
MTLN	ENSG00000175701	protein_coding	0.279702	4.29582e-13
C19orf73	ENSG00000221916	protein_coding	0.279699	4.29829e-13
GNB1L	ENSG00000185838	protein_coding	0.27968	4.31406e-13
SLC25A20	ENSG00000178537	protein_coding	0.279511	4.46202e-13
WDR59	ENSG00000103091	protein_coding	0.279501	4.47101e-13
RACK1	ENSG00000204628	protein_coding	0.279441	4.52462e-13
GLYATL1	ENSG00000166840	protein_coding	0.279417	4.54617e-13
BRSK2	ENSG00000174672	protein_coding	0.279394	4.56685e-13
TBC1D16	ENSG00000167291	protein_coding	0.279267	4.68418e-13
NDUFS6	ENSG00000145494	protein_coding	0.279232	4.71687e-13
RGL2	ENSG00000237441	protein_coding	0.27921	4.73743e-13
CASP6	ENSG00000138794	protein_coding	0.279165	4.77984e-13
TMUB1	ENSG00000164897	protein_coding	0.279119	4.82333e-13
FAM222A	ENSG00000139438	protein_coding	0.279072	4.86876e-13
TMEM8B	ENSG00000137103	protein_coding	0.279013	4.92586e-13
FRAT2	ENSG00000181274	protein_coding	0.278995	4.94438e-13
AKAP17A	ENSG00000197976	protein_coding	0.278783	5.15663e-13
WWOX	ENSG00000186153	protein_coding	0.278769	5.17127e-13
ZNF853	ENSG00000236609	protein_coding	0.278737	5.20374e-13
JAG2	ENSG00000184916	protein_coding	0.278631	5.31445e-13
RPS11	ENSG00000142534	protein_coding	0.278587	5.36058e-13
RPL29	ENSG00000162244	protein_coding	0.278553	5.39738e-13
CKM	ENSG00000104879	protein_coding	0.278394	5.56935e-13
MAP4K2	ENSG00000168067	protein_coding	0.278383	5.58219e-13
TRAPPC9	ENSG00000167632	protein_coding	0.278337	5.63336e-13
SYNGR2	ENSG00000108639	protein_coding	0.278033	5.98243e-13
PABPC1	ENSG00000070756	protein_coding	0.277997	6.02517e-13
EVA1A	ENSG00000115363	protein_coding	0.277997	6.02546e-13
PTPRD	ENSG00000153707	protein_coding	0.277982	6.04371e-13
ABHD12	ENSG00000100997	protein_coding	0.277952	6.07955e-13
WFDC10A	ENSG00000180305	protein_coding	0.277876	6.17109e-13
ACSS1	ENSG00000154930	protein_coding	0.277817	6.24415e-13
MYRIP	ENSG00000170011	protein_coding	0.277815	6.24556e-13
GPR39	ENSG00000183840	protein_coding	0.277722	6.36169e-13
SMAD6	ENSG00000137834	protein_coding	0.277606	6.50885e-13
SDR42E1	ENSG00000184860	protein_coding	0.27759	6.53051e-13
RTL10	ENSG00000215012	protein_coding	0.277413	6.76164e-13
HDAC11	ENSG00000163517	protein_coding	0.277285	6.93439e-13
ACSF2	ENSG00000167107	protein_coding	0.277276	6.94712e-13
SCRN2	ENSG00000141295	protein_coding	0.277181	7.07843e-13
EEFSEC	ENSG00000132394	protein_coding	0.27711	7.17868e-13
CCNQ	ENSG00000262919	protein_coding	0.277076	7.22708e-13
TEX264	ENSG00000164081	protein_coding	0.276888	7.4987e-13
TRIM28	ENSG00000130726	protein_coding	0.276857	7.54555e-13
PYCARD	ENSG00000103490	protein_coding	0.276831	7.58367e-13
HDHD5	ENSG00000069998	protein_coding	0.27681	7.61478e-13
PPIE	ENSG00000084072	protein_coding	0.276686	7.80398e-13
CIAO2B	ENSG00000166595	protein_coding	0.276676	7.81907e-13
CACFD1	ENSG00000160325	protein_coding	0.276605	7.92888e-13
GNPTG	ENSG00000090581	protein_coding	0.276581	7.96609e-13
SARS1	ENSG00000031698	protein_coding	0.2765	8.09425e-13
DYRK1B	ENSG00000105204	protein_coding	0.276499	8.09658e-13
RPS18	ENSG00000231500	protein_coding	0.276413	8.23361e-13
PRPF19	ENSG00000110107	protein_coding	0.276298	8.42228e-13
MRPL48	ENSG00000175581	protein_coding	0.276287	8.44073e-13
SNTA1	ENSG00000101400	protein_coding	0.276141	8.68486e-13
WNK4	ENSG00000126562	protein_coding	0.276133	8.6991e-13
TRAF5	ENSG00000082512	protein_coding	0.276062	8.82162e-13
CDHR5	ENSG00000099834	protein_coding	0.276041	8.85728e-13
RPL7A	ENSG00000148303	protein_coding	0.275784	9.31507e-13
WNT5B	ENSG00000111186	protein_coding	0.275695	9.47949e-13
RPS28	ENSG00000233927	protein_coding	0.275654	9.55517e-13
DGCR2	ENSG00000070413	protein_coding	0.275553	9.74682e-13
TUFT1	ENSG00000143367	protein_coding	0.275536	9.77904e-13
LRATD1	ENSG00000162981	protein_coding	0.275264	1.03142e-12
PPP1R14A	ENSG00000167641	protein_coding	0.2752	1.04434e-12
JMJD4	ENSG00000081692	protein_coding	0.275199	1.04463e-12
MRPL2	ENSG00000112651	protein_coding	0.275135	1.05777e-12
ADAT3	ENSG00000213638	protein_coding	0.275129	1.05893e-12
RHOT2	ENSG00000140983	protein_coding	0.275124	1.06e-12
CENPT	ENSG00000102901	protein_coding	0.274999	1.08629e-12
EIF2B5	ENSG00000145191	protein_coding	0.274979	1.09058e-12
WNT6	ENSG00000115596	protein_coding	0.274967	1.09315e-12
P2RY2	ENSG00000175591	protein_coding	0.27491	1.10532e-12
NCKAP5	ENSG00000176771	protein_coding	0.274898	1.10783e-12
POLR2C	ENSG00000102978	protein_coding	0.274847	1.1189e-12
NMRAL1	ENSG00000153406	protein_coding	0.274803	1.1286e-12
THAP11	ENSG00000168286	protein_coding	0.274801	1.12901e-12
C8orf82	ENSG00000213563	protein_coding	0.274735	1.14374e-12
OLFM4	ENSG00000102837	protein_coding	0.274615	1.17075e-12
ACAT2	ENSG00000120437	protein_coding	0.274606	1.17281e-12
CDCA7	ENSG00000144354	protein_coding	0.274596	1.17515e-12
ACAD9	ENSG00000177646	protein_coding	0.274589	1.17679e-12
ELMO3	ENSG00000102890	protein_coding	0.274317	1.24083e-12
ILDR1	ENSG00000145103	protein_coding	0.274208	1.2675e-12
PMPCA	ENSG00000165688	protein_coding	0.274142	1.28396e-12
RPUSD3	ENSG00000156990	protein_coding	0.274116	1.29029e-12
HDAC5	ENSG00000108840	protein_coding	0.274116	1.2903e-12
SAP18	ENSG00000150459	protein_coding	0.274051	1.3069e-12
AZGP1	ENSG00000160862	protein_coding	0.274035	1.31085e-12
OTUB1	ENSG00000167770	protein_coding	0.273872	1.35308e-12
SELENOO	ENSG00000073169	protein_coding	0.273828	1.36477e-12
CBLC	ENSG00000142273	protein_coding	0.273803	1.37136e-12
NOC4L	ENSG00000184967	protein_coding	0.273657	1.41093e-12
CDK4	ENSG00000135446	protein_coding	0.273617	1.42193e-12
VMAC	ENSG00000187650	protein_coding	0.273617	1.42204e-12
MRPL10	ENSG00000159111	protein_coding	0.273572	1.43446e-12
GALNT6	ENSG00000139629	protein_coding	0.273566	1.43607e-12
C17orf113	ENSG00000267221	protein_coding	0.273499	1.45478e-12
VARS1	ENSG00000204394	protein_coding	0.273433	1.47375e-12
ARAF	ENSG00000078061	protein_coding	0.273432	1.47386e-12
SDC1	ENSG00000115884	protein_coding	0.273379	1.48917e-12
TMEM98	ENSG00000006042	protein_coding	0.273125	1.56436e-12
RPL10	ENSG00000147403	protein_coding	0.273078	1.57873e-12
SLC51B	ENSG00000186198	protein_coding	0.273022	1.59587e-12
CPLX2	ENSG00000145920	protein_coding	0.27293	1.62461e-12
TRAF4	ENSG00000076604	protein_coding	0.272862	1.64614e-12
RAVER1	ENSG00000161847	protein_coding	0.272854	1.64875e-12
LRSAM1	ENSG00000148356	protein_coding	0.27272	1.69211e-12
NHLRC1	ENSG00000187566	protein_coding	0.272703	1.69769e-12
SPINDOC	ENSG00000168005	protein_coding	0.272599	1.73221e-12
GLB1L2	ENSG00000149328	protein_coding	0.272591	1.73479e-12
MSRB2	ENSG00000148450	protein_coding	0.272518	1.75936e-12
GALK1	ENSG00000108479	protein_coding	0.272508	1.763e-12
CHCHD5	ENSG00000125611	protein_coding	0.272417	1.7943e-12
TFAP4	ENSG00000090447	protein_coding	0.272394	1.80229e-12
SUV39H1	ENSG00000101945	protein_coding	0.272146	1.89051e-12
TIMM10	ENSG00000134809	protein_coding	0.27203	1.93343e-12
PICK1	ENSG00000100151	protein_coding	0.2718	2.02123e-12
ZNHIT1	ENSG00000106400	protein_coding	0.271677	2.06987e-12
RPL10A	ENSG00000198755	protein_coding	0.271589	2.10525e-12
CTSA	ENSG00000064601	protein_coding	0.271586	2.10642e-12
PTGES2	ENSG00000148334	protein_coding	0.271565	2.11501e-12
PCED1A	ENSG00000132635	protein_coding	0.271511	2.13709e-12
TMEM89	ENSG00000183396	protein_coding	0.271475	2.15169e-12
ADCK2	ENSG00000133597	protein_coding	0.271374	2.19395e-12
FHDC1	ENSG00000137460	protein_coding	0.271336	2.21037e-12
JOSD2	ENSG00000161677	protein_coding	0.271288	2.23087e-12
CLPTM1L	ENSG00000049656	protein_coding	0.271253	2.24572e-12
TBL3	ENSG00000183751	protein_coding	0.271234	2.25409e-12
PRRG2	ENSG00000126460	protein_coding	0.27111	2.30843e-12
ATP5MC1	ENSG00000159199	protein_coding	0.270883	2.41152e-12
AKT2	ENSG00000105221	protein_coding	0.270781	2.45917e-12
CHP2	ENSG00000166869	protein_coding	0.270777	2.46094e-12
GPR160	ENSG00000173890	protein_coding	0.270755	2.47127e-12
IRF2BP2	ENSG00000168264	protein_coding	0.270652	2.52072e-12
IDH2	ENSG00000182054	protein_coding	0.270584	2.55402e-12
RAB11FIP4	ENSG00000131242	protein_coding	0.270425	2.63269e-12
BCL2L1	ENSG00000171552	protein_coding	0.270333	2.67986e-12
LRRC20	ENSG00000172731	protein_coding	0.270196	2.75125e-12
SGF29	ENSG00000176476	protein_coding	0.270182	2.75846e-12
RIPPLY3	ENSG00000183145	protein_coding	0.270138	2.78168e-12
MRPL4	ENSG00000105364	protein_coding	0.270023	2.84378e-12
FAHD1	ENSG00000180185	protein_coding	0.269889	2.91732e-12
C6orf15	ENSG00000204542	protein_coding	0.269861	2.93346e-12
MRPS33	ENSG00000090263	protein_coding	0.26986	2.93408e-12
UFC1	ENSG00000143222	protein_coding	0.26981	2.96188e-12
NAIF1	ENSG00000171169	protein_coding	0.269675	3.03952e-12
VPS25	ENSG00000131475	protein_coding	0.269546	3.11538e-12
RPL18	ENSG00000063177	protein_coding	0.269501	3.14193e-12
PES1	ENSG00000100029	protein_coding	0.269426	3.18782e-12
KCNK17	ENSG00000124780	protein_coding	0.26941	3.19742e-12
COX5B	ENSG00000135940	protein_coding	0.269338	3.24177e-12
SCT	ENSG00000070031	protein_coding	0.269316	3.25491e-12
LAMTOR1	ENSG00000149357	protein_coding	0.269314	3.25644e-12
MEST	ENSG00000106484	protein_coding	0.269156	3.35639e-12
CPNE9	ENSG00000144550	protein_coding	0.269109	3.38613e-12
CCDC85B	ENSG00000175602	protein_coding	0.269042	3.42998e-12
TP53I13	ENSG00000167543	protein_coding	0.268995	3.461e-12
DBI	ENSG00000155368	protein_coding	0.268872	3.54264e-12
SLC35D3	ENSG00000182747	protein_coding	0.26887	3.54402e-12
RPL37A	ENSG00000197756	protein_coding	0.268773	3.61044e-12
BOD1	ENSG00000145919	protein_coding	0.26877	3.61202e-12
PNPLA6	ENSG00000032444	protein_coding	0.268728	3.64151e-12
PLA2G15	ENSG00000103066	protein_coding	0.268712	3.65239e-12
UQCC3	ENSG00000204922	protein_coding	0.2686	3.73126e-12
MCF2L	ENSG00000126217	protein_coding	0.268528	3.78252e-12
HDAC10	ENSG00000100429	protein_coding	0.268259	3.98077e-12
PRKCZ	ENSG00000067606	protein_coding	0.268245	3.99171e-12
PRMT1	ENSG00000126457	protein_coding	0.268201	4.02532e-12
RCC1L	ENSG00000274523	protein_coding	0.268154	4.0612e-12
CLYBL	ENSG00000125246	protein_coding	0.268137	4.0746e-12
NXT1	ENSG00000132661	protein_coding	0.2679	4.26185e-12
SCD	ENSG00000099194	protein_coding	0.267897	4.26448e-12
ANKRD27	ENSG00000105186	protein_coding	0.26786	4.29426e-12
FAM174C	ENSG00000228300	protein_coding	0.26784	4.31104e-12
GADD45G	ENSG00000130222	protein_coding	0.267837	4.31275e-12
SNRPB	ENSG00000125835	protein_coding	0.26783	4.31874e-12
TIMM44	ENSG00000104980	protein_coding	0.26783	4.31912e-12
TXN2	ENSG00000100348	protein_coding	0.267772	4.36685e-12
DUSP16	ENSG00000111266	protein_coding	0.267715	4.41415e-12
EPB41L1	ENSG00000088367	protein_coding	0.26763	4.48558e-12
STAU1	ENSG00000124214	protein_coding	0.267601	4.5109e-12
PCSK1N	ENSG00000102109	protein_coding	0.267572	4.53576e-12
INPP5D	ENSG00000168918	protein_coding	0.267408	4.67836e-12
CAPN15	ENSG00000103326	protein_coding	0.267343	4.73658e-12
ZSWIM5	ENSG00000162415	protein_coding	0.267263	4.8088e-12
CFAP410	ENSG00000160226	protein_coding	0.267245	4.82487e-12
NDUFA3	ENSG00000170906	protein_coding	0.267226	4.84253e-12
HS1BP3	ENSG00000118960	protein_coding	0.267193	4.87249e-12
PEPD	ENSG00000124299	protein_coding	0.267164	4.89979e-12
METAP1D	ENSG00000172878	protein_coding	0.266977	5.07581e-12
DIDO1	ENSG00000101191	protein_coding	0.266961	5.09166e-12
RUVBL2	ENSG00000183207	protein_coding	0.266927	5.12399e-12
PEX10	ENSG00000157911	protein_coding	0.266863	5.18618e-12
NCLN	ENSG00000125912	protein_coding	0.266819	5.23015e-12
HSPH1	ENSG00000120694	protein_coding	0.266674	5.37455e-12
RBM42	ENSG00000126254	protein_coding	0.26663	5.41992e-12
SERPINA10	ENSG00000140093	protein_coding	0.266544	5.5081e-12
TFPT	ENSG00000105619	protein_coding	0.266501	5.55374e-12
HSPBP1	ENSG00000133265	protein_coding	0.266494	5.56059e-12
DUSP23	ENSG00000158716	protein_coding	0.266437	5.6203e-12
CAT	ENSG00000121691	protein_coding	0.266055	6.04003e-12
RNASET2	ENSG00000026297	protein_coding	0.266023	6.07686e-12
LRRC61	ENSG00000127399	protein_coding	0.266006	6.09612e-12
TMEM250	ENSG00000238227	protein_coding	0.265864	6.26145e-12
POLD2	ENSG00000106628	protein_coding	0.265835	6.2955e-12
RFNG	ENSG00000169733	protein_coding	0.265797	6.34078e-12
CDK18	ENSG00000117266	protein_coding	0.26576	6.38538e-12
GRAMD2A	ENSG00000175318	protein_coding	0.265622	6.55338e-12
IKBKE	ENSG00000263528	protein_coding	0.265573	6.61323e-12
GAL3ST2	ENSG00000154252	protein_coding	0.265542	6.652e-12
RASSF7	ENSG00000099849	protein_coding	0.26554	6.65492e-12
MARS2	ENSG00000247626	protein_coding	0.265524	6.67429e-12
METTL22	ENSG00000067365	protein_coding	0.26542	6.80623e-12
HRCT1	ENSG00000196196	protein_coding	0.265405	6.82539e-12
LCMT1	ENSG00000205629	protein_coding	0.265286	6.97959e-12
LRFN4	ENSG00000173621	protein_coding	0.26523	7.05385e-12
PALM3	ENSG00000187867	protein_coding	0.265179	7.12158e-12
SLC39A2	ENSG00000165794	protein_coding	0.265158	7.14985e-12
XAB2	ENSG00000076924	protein_coding	0.265086	7.24684e-12
TIGD5	ENSG00000179886	protein_coding	0.26501	7.35101e-12
TMEM129	ENSG00000168936	protein_coding	0.264943	7.44351e-12
TAB1	ENSG00000100324	protein_coding	0.264911	7.48788e-12
UQCRQ	ENSG00000164405	protein_coding	0.264768	7.69217e-12
ABCF2	ENSG00000033050	protein_coding	0.264665	7.84079e-12
CEBPB	ENSG00000172216	protein_coding	0.264655	7.85635e-12
LSM14B	ENSG00000149657	protein_coding	0.264649	7.86527e-12
ERI3	ENSG00000117419	protein_coding	0.264639	7.88019e-12
SLC16A5	ENSG00000170190	protein_coding	0.264585	7.95953e-12
ZNF622	ENSG00000173545	protein_coding	0.264585	7.95964e-12
VEGFB	ENSG00000173511	protein_coding	0.264539	8.02816e-12
OTULINL	ENSG00000145569	protein_coding	0.264418	8.21268e-12
LPO	ENSG00000167419	protein_coding	0.264388	8.25795e-12
ZFP41	ENSG00000181638	protein_coding	0.264243	8.48507e-12
CDH1	ENSG00000039068	protein_coding	0.264148	8.63757e-12
NME4	ENSG00000103202	protein_coding	0.264142	8.64717e-12
COA4	ENSG00000181924	protein_coding	0.264058	8.78334e-12
CYB5B	ENSG00000103018	protein_coding	0.263994	8.88951e-12
ATP6V1F	ENSG00000128524	protein_coding	0.26399	8.89533e-12
DBNDD2	ENSG00000244274	protein_coding	0.263884	9.07429e-12
ZNRD2	ENSG00000173465	protein_coding	0.263845	9.13945e-12
HMGCS2	ENSG00000134240	protein_coding	0.263756	9.29297e-12
RPL36	ENSG00000130255	protein_coding	0.263541	9.67288e-12
CCT3	ENSG00000163468	protein_coding	0.263447	9.84357e-12
FARSA	ENSG00000179115	protein_coding	0.263424	9.88654e-12
SLC10A3	ENSG00000126903	protein_coding	0.263297	1.01229e-11
C22orf39	ENSG00000242259	protein_coding	0.263273	1.01674e-11
TARBP2	ENSG00000139546	protein_coding	0.263249	1.02134e-11
MTCH2	ENSG00000109919	protein_coding	0.263129	1.04444e-11
YIF1A	ENSG00000174851	protein_coding	0.2631	1.05001e-11
PLEKHA4	ENSG00000105559	protein_coding	0.263063	1.05726e-11
ARMC5	ENSG00000140691	protein_coding	0.262975	1.0748e-11
ZNF524	ENSG00000171443	protein_coding	0.262934	1.08303e-11
SLC22A3	ENSG00000146477	protein_coding	0.262926	1.08455e-11
DXO	ENSG00000204348	protein_coding	0.262915	1.08679e-11
HADH	ENSG00000138796	protein_coding	0.262851	1.09976e-11
LRP3	ENSG00000130881	protein_coding	0.262834	1.1033e-11
COASY	ENSG00000068120	protein_coding	0.262739	1.12284e-11
SPAG4	ENSG00000061656	protein_coding	0.262718	1.12732e-11
CENPX	ENSG00000169689	protein_coding	0.262689	1.13343e-11
SMIM4	ENSG00000168273	protein_coding	0.262642	1.14334e-11
MYO7B	ENSG00000169994	protein_coding	0.262568	1.15904e-11
TMEM216	ENSG00000187049	protein_coding	0.262499	1.17402e-11
PGLS	ENSG00000130313	protein_coding	0.262439	1.18721e-11
POLD1	ENSG00000062822	protein_coding	0.262377	1.20099e-11
ITPA	ENSG00000125877	protein_coding	0.262328	1.21176e-11
CYP2S1	ENSG00000167600	protein_coding	0.262174	1.24686e-11
PLIN2	ENSG00000147872	protein_coding	0.26217	1.24778e-11
RHPN1	ENSG00000158106	protein_coding	0.262104	1.26314e-11
MAN2C1	ENSG00000140400	protein_coding	0.262001	1.2875e-11
ADCK1	ENSG00000063761	protein_coding	0.261999	1.2879e-11
UPF3A	ENSG00000169062	protein_coding	0.261981	1.29224e-11
CLP1	ENSG00000172409	protein_coding	0.261902	1.31123e-11
PTGES3L	ENSG00000267060	protein_coding	0.261834	1.32789e-11
TMEM53	ENSG00000126106	protein_coding	0.261818	1.33191e-11
CCDC188	ENSG00000234409	protein_coding	0.261768	1.34424e-11
EPHX2	ENSG00000120915	protein_coding	0.261694	1.36286e-11
CPSF4	ENSG00000160917	protein_coding	0.261582	1.3913e-11
AKR1C3	ENSG00000196139	protein_coding	0.261578	1.39225e-11
STOML1	ENSG00000067221	protein_coding	0.26152	1.40728e-11
EMC8	ENSG00000131148	protein_coding	0.261451	1.42533e-11
RPL30	ENSG00000156482	protein_coding	0.261444	1.42709e-11
PISD	ENSG00000241878	protein_coding	0.261431	1.4307e-11
ACKR3	ENSG00000144476	protein_coding	0.261378	1.44478e-11
CLPB	ENSG00000162129	protein_coding	0.261303	1.46479e-11
ZMIZ2	ENSG00000122515	protein_coding	0.261289	1.46871e-11
TRPM2	ENSG00000142185	protein_coding	0.261281	1.47074e-11
FAAP100	ENSG00000185504	protein_coding	0.261275	1.47244e-11
ZC3H3	ENSG00000014164	protein_coding	0.261255	1.47774e-11
DPM1	ENSG00000000419	protein_coding	0.261136	1.5107e-11
ACAP3	ENSG00000131584	protein_coding	0.261063	1.53102e-11
NOX1	ENSG00000007952	protein_coding	0.261004	1.54798e-11
GIT1	ENSG00000108262	protein_coding	0.260974	1.55655e-11
AKAP1	ENSG00000121057	protein_coding	0.260812	1.60372e-11
TWNK	ENSG00000107815	protein_coding	0.260798	1.60761e-11
TRUB2	ENSG00000167112	protein_coding	0.260798	1.60785e-11
TMEM208	ENSG00000168701	protein_coding	0.260719	1.63133e-11
CDK5	ENSG00000164885	protein_coding	0.260692	1.63951e-11
AL121845.3	ENSG00000273154	protein_coding	0.260671	1.64579e-11
CSE1L	ENSG00000124207	protein_coding	0.260668	1.64677e-11
ABCB1	ENSG00000085563	protein_coding	0.260657	1.65002e-11
MRPS31	ENSG00000102738	protein_coding	0.260629	1.65841e-11
TRAF7	ENSG00000131653	protein_coding	0.260622	1.6608e-11
ZNF768	ENSG00000169957	protein_coding	0.260538	1.68655e-11
MED25	ENSG00000104973	protein_coding	0.260439	1.71742e-11
CUL4A	ENSG00000139842	protein_coding	0.260328	1.75306e-11
RPUSD4	ENSG00000165526	protein_coding	0.260264	1.77386e-11
KRTAP3-2	ENSG00000212900	protein_coding	0.259944	1.88116e-11
MYO1A	ENSG00000166866	protein_coding	0.259921	1.88894e-11
C5orf52	ENSG00000187658	protein_coding	0.25991	1.8929e-11
RPUSD2	ENSG00000166133	protein_coding	0.259838	1.9179e-11
SDHAF4	ENSG00000154079	protein_coding	0.25983	1.9209e-11
PIGZ	ENSG00000119227	protein_coding	0.259733	1.95525e-11
CUEDC2	ENSG00000107874	protein_coding	0.259717	1.96102e-11
POLR1C	ENSG00000171453	protein_coding	0.259714	1.96206e-11
CCDC130	ENSG00000104957	protein_coding	0.259672	1.97721e-11
GRPR	ENSG00000126010	protein_coding	0.259517	2.03439e-11
TTC12	ENSG00000149292	protein_coding	0.259485	2.04611e-11
STX16	ENSG00000124222	protein_coding	0.259471	2.05155e-11
MUS81	ENSG00000172732	protein_coding	0.259412	2.07353e-11
MTRF1	ENSG00000120662	protein_coding	0.259077	2.20475e-11
RNF182	ENSG00000180537	protein_coding	0.258992	2.23916e-11
NPRL2	ENSG00000114388	protein_coding	0.25895	2.25673e-11
RSPH14	ENSG00000100218	protein_coding	0.258895	2.27951e-11
SLC26A3	ENSG00000091138	protein_coding	0.258845	2.30035e-11
SLC25A39	ENSG00000013306	protein_coding	0.258638	2.38906e-11
NKPD1	ENSG00000179846	protein_coding	0.258613	2.39962e-11
DDX39A	ENSG00000123136	protein_coding	0.258541	2.4317e-11
SAPCD2	ENSG00000186193	protein_coding	0.258536	2.43384e-11
INTS5	ENSG00000185085	protein_coding	0.258408	2.49113e-11
CXCR3	ENSG00000186810	protein_coding	0.258358	2.51406e-11
LCN15	ENSG00000177984	protein_coding	0.258321	2.53093e-11
PSPH	ENSG00000146733	protein_coding	0.258269	2.55496e-11
RPP25L	ENSG00000164967	protein_coding	0.258151	2.61066e-11
CERK	ENSG00000100422	protein_coding	0.258148	2.61192e-11
OXGR1	ENSG00000165621	protein_coding	0.258061	2.6537e-11
RP9	ENSG00000164610	protein_coding	0.257975	2.69543e-11
SNRPC	ENSG00000124562	protein_coding	0.25797	2.69817e-11
MYLPF	ENSG00000180209	protein_coding	0.257959	2.70343e-11
RPS19BP1	ENSG00000187051	protein_coding	0.257859	2.75303e-11
SLC35A2	ENSG00000102100	protein_coding	0.25783	2.76747e-11
SCFD2	ENSG00000184178	protein_coding	0.257659	2.85526e-11
MVK	ENSG00000110921	protein_coding	0.257509	2.93417e-11
EFNA1	ENSG00000169242	protein_coding	0.257423	2.97995e-11
UBE2C	ENSG00000175063	protein_coding	0.257405	2.98992e-11
LYRM4	ENSG00000214113	protein_coding	0.25738	3.00361e-11
RPLP0	ENSG00000089157	protein_coding	0.257273	3.06254e-11
C14orf93	ENSG00000100802	protein_coding	0.257204	3.10083e-11
PIWIL4	ENSG00000134627	protein_coding	0.257204	3.1009e-11
BAG6	ENSG00000204463	protein_coding	0.257109	3.15496e-11
GET4	ENSG00000239857	protein_coding	0.257081	3.17107e-11
RFX1	ENSG00000132005	protein_coding	0.257002	3.21651e-11
NODAL	ENSG00000156574	protein_coding	0.256945	3.25014e-11
C9orf16	ENSG00000171159	protein_coding	0.256875	3.29126e-11
MACROH2A2	ENSG00000099284	protein_coding	0.256849	3.30696e-11
PPP1R7	ENSG00000115685	protein_coding	0.256543	3.49516e-11
ZNF213	ENSG00000085644	protein_coding	0.256528	3.50481e-11
SAC3D1	ENSG00000168061	protein_coding	0.256353	3.61763e-11
STMND1	ENSG00000230873	protein_coding	0.256297	3.65446e-11
FAM189A1	ENSG00000104059	protein_coding	0.256283	3.66319e-11
NUDT1	ENSG00000106268	protein_coding	0.256277	3.66732e-11
ZNF513	ENSG00000163795	protein_coding	0.25623	3.69905e-11
ITFG2	ENSG00000111203	protein_coding	0.256209	3.71286e-11
IDH3B	ENSG00000101365	protein_coding	0.256117	3.77518e-11
CARD10	ENSG00000100065	protein_coding	0.25598	3.86945e-11
SIGMAR1	ENSG00000147955	protein_coding	0.255926	3.90728e-11
PVR	ENSG00000073008	protein_coding	0.255827	3.97772e-11
QPCTL	ENSG00000011478	protein_coding	0.255778	4.01272e-11
PLB1	ENSG00000163803	protein_coding	0.255685	4.08065e-11
DOHH	ENSG00000129932	protein_coding	0.255543	4.18671e-11
KAT8	ENSG00000103510	protein_coding	0.255477	4.23639e-11
STK16	ENSG00000115661	protein_coding	0.25542	4.28071e-11
TOLLIP	ENSG00000078902	protein_coding	0.25536	4.3266e-11
C6orf223	ENSG00000181577	protein_coding	0.255116	4.52084e-11
TIMM50	ENSG00000105197	protein_coding	0.25493	4.67494e-11
LRRC45	ENSG00000169683	protein_coding	0.254897	4.70227e-11
KRTAP5-1	ENSG00000205869	protein_coding	0.254889	4.70951e-11
ATP6V1H	ENSG00000047249	protein_coding	0.254886	4.71159e-11
FASN	ENSG00000169710	protein_coding	0.254767	4.81368e-11
BNIP5	ENSG00000189325	protein_coding	0.254753	4.8257e-11
CST3	ENSG00000101439	protein_coding	0.254709	4.86394e-11
PLOD3	ENSG00000106397	protein_coding	0.254706	4.86681e-11
FBXL15	ENSG00000107872	protein_coding	0.254686	4.88413e-11
ATXN7L2	ENSG00000162650	protein_coding	0.254685	4.88499e-11
COL9A1	ENSG00000112280	protein_coding	0.254522	5.03011e-11
STUB1	ENSG00000103266	protein_coding	0.254489	5.05974e-11
NOL12	ENSG00000273899	protein_coding	0.254452	5.09366e-11
SRPX2	ENSG00000102359	protein_coding	0.25444	5.10449e-11
TAS1R3	ENSG00000169962	protein_coding	0.254437	5.10678e-11
C1orf122	ENSG00000197982	protein_coding	0.254351	5.1865e-11
GEMIN8	ENSG00000046647	protein_coding	0.25408	5.44381e-11
NDUFAF3	ENSG00000178057	protein_coding	0.253926	5.59603e-11
GRK6	ENSG00000198055	protein_coding	0.253844	5.67842e-11
WDR1	ENSG00000071127	protein_coding	0.253824	5.69946e-11
MLLT6	ENSG00000275023	protein_coding	0.253769	5.75507e-11
FAM171A1	ENSG00000148468	protein_coding	0.253759	5.76581e-11
PEX11G	ENSG00000104883	protein_coding	0.253504	6.03483e-11
IFT52	ENSG00000101052	protein_coding	0.253449	6.09391e-11
PPP2R3B	ENSG00000167393	protein_coding	0.25342	6.12569e-11
MAP3K11	ENSG00000173327	protein_coding	0.253402	6.1448e-11
FBXL19	ENSG00000099364	protein_coding	0.253356	6.19622e-11
GDPD5	ENSG00000158555	protein_coding	0.253246	6.31824e-11
REX1BD	ENSG00000006015	protein_coding	0.25322	6.34806e-11
NPRL3	ENSG00000103148	protein_coding	0.253211	6.35862e-11
PMM1	ENSG00000100417	protein_coding	0.253151	6.42618e-11
PSMG1	ENSG00000183527	protein_coding	0.25313	6.4504e-11
ASMTL	ENSG00000169093	protein_coding	0.253099	6.48695e-11
B4GALT7	ENSG00000027847	protein_coding	0.252817	6.82055e-11
TRAPPC2L	ENSG00000167515	protein_coding	0.252749	6.90366e-11
ZNF500	ENSG00000103199	protein_coding	0.252729	6.92785e-11
SMPD3	ENSG00000103056	protein_coding	0.252671	7.00038e-11
PRELID3B	ENSG00000101166	protein_coding	0.252571	7.12607e-11
PHYHIPL	ENSG00000165443	protein_coding	0.252517	7.19402e-11
ANKRD13B	ENSG00000198720	protein_coding	0.252508	7.20589e-11
TECR	ENSG00000099797	protein_coding	0.252507	7.20778e-11
ZNF48	ENSG00000180035	protein_coding	0.252493	7.22561e-11
C10orf67	ENSG00000179133	protein_coding	0.2523	7.47704e-11
RRNAD1	ENSG00000143303	protein_coding	0.252061	7.8017e-11
EVPL	ENSG00000167880	protein_coding	0.251995	7.89368e-11
CKB	ENSG00000166165	protein_coding	0.251921	7.99665e-11
WFS1	ENSG00000109501	protein_coding	0.251845	8.10546e-11
NELFB	ENSG00000188986	protein_coding	0.251802	8.16762e-11
PRDX2	ENSG00000167815	protein_coding	0.251757	8.2328e-11
FAM217B	ENSG00000196227	protein_coding	0.251747	8.24848e-11
MRPL11	ENSG00000174547	protein_coding	0.251712	8.29891e-11
DPH7	ENSG00000148399	protein_coding	0.251663	8.37151e-11
RPL18A	ENSG00000105640	protein_coding	0.251636	8.41225e-11
PLTP	ENSG00000100979	protein_coding	0.251596	8.47078e-11
EIPR1	ENSG00000032389	protein_coding	0.251596	8.47089e-11
TFEB	ENSG00000112561	protein_coding	0.25159	8.47968e-11
ZNF219	ENSG00000165804	protein_coding	0.251569	8.51137e-11
ZNF71	ENSG00000197951	protein_coding	0.251562	8.52292e-11
CFAP20	ENSG00000070761	protein_coding	0.251384	8.79484e-11
CCDC183	ENSG00000213213	protein_coding	0.251131	9.197e-11
PROX1	ENSG00000117707	protein_coding	0.250953	9.49079e-11
ATP6AP1	ENSG00000071553	protein_coding	0.250947	9.50082e-11
ATOH8	ENSG00000168874	protein_coding	0.250897	9.5853e-11
MT4	ENSG00000102891	protein_coding	0.25089	9.59772e-11
LDLRAD3	ENSG00000179241	protein_coding	0.250806	9.73992e-11
COX14	ENSG00000178449	protein_coding	0.250772	9.79986e-11
HPS1	ENSG00000107521	protein_coding	0.250676	9.9663e-11
NRXN3	ENSG00000021645	protein_coding	0.250668	9.98027e-11
MCM7	ENSG00000166508	protein_coding	0.250431	1.04067e-10
THOP1	ENSG00000172009	protein_coding	0.250429	1.04096e-10
EPHB1	ENSG00000154928	protein_coding	0.250352	1.05527e-10
CTU1	ENSG00000142544	protein_coding	0.250338	1.05783e-10
ZMAT5	ENSG00000100319	protein_coding	0.250323	1.06064e-10
MACROH2A1	ENSG00000113648	protein_coding	0.250184	1.0869e-10
CCDC24	ENSG00000159214	protein_coding	0.250107	1.10169e-10
RPS6KL1	ENSG00000198208	protein_coding	0.25007	1.10891e-10
LANCL2	ENSG00000132434	protein_coding	0.250066	1.10964e-10
SNORC	ENSG00000182600	protein_coding	0.25	1.12259e-10
ELF5	ENSG00000135374	protein_coding	0.249824	1.15802e-10
TMLHE	ENSG00000185973	protein_coding	0.249706	1.18224e-10
METTL1	ENSG00000037897	protein_coding	0.249694	1.18458e-10
MRPS26	ENSG00000125901	protein_coding	0.249676	1.18847e-10
SHLD1	ENSG00000171984	protein_coding	0.249509	1.22369e-10
PCYT2	ENSG00000185813	protein_coding	0.249405	1.24639e-10
TOMM40	ENSG00000130204	protein_coding	0.249299	1.26971e-10
VPS72	ENSG00000163159	protein_coding	0.24927	1.27609e-10
KLHDC4	ENSG00000104731	protein_coding	0.24914	1.30548e-10
GNAS	ENSG00000087460	protein_coding	0.249096	1.31575e-10
ZNF710	ENSG00000140548	protein_coding	0.249013	1.33488e-10
PRDX4	ENSG00000123131	protein_coding	0.248982	1.34222e-10
NAT10	ENSG00000135372	protein_coding	0.248862	1.37067e-10
HAAO	ENSG00000162882	protein_coding	0.248852	1.37303e-10
RANBP10	ENSG00000141084	protein_coding	0.24878	1.39049e-10
SMPDL3B	ENSG00000130768	protein_coding	0.248747	1.39846e-10
TRPM5	ENSG00000070985	protein_coding	0.248519	1.45524e-10
NABP2	ENSG00000139579	protein_coding	0.248465	1.46906e-10
UTP14A	ENSG00000156697	protein_coding	0.24832	1.50683e-10
MME	ENSG00000196549	protein_coding	0.248283	1.51648e-10
MRPL14	ENSG00000180992	protein_coding	0.248224	1.53214e-10
FBXW9	ENSG00000132004	protein_coding	0.248202	1.53803e-10
LRIT2	ENSG00000204033	protein_coding	0.248154	1.55102e-10
DHODH	ENSG00000102967	protein_coding	0.248139	1.55505e-10
RPP40	ENSG00000124787	protein_coding	0.248133	1.55668e-10
TMEM198	ENSG00000188760	protein_coding	0.248112	1.56237e-10
GPKOW	ENSG00000068394	protein_coding	0.248081	1.57101e-10
STOML2	ENSG00000165283	protein_coding	0.248046	1.58048e-10
BTBD2	ENSG00000133243	protein_coding	0.248002	1.59282e-10
ZNF581	ENSG00000171425	protein_coding	0.247958	1.60491e-10
MZT2A	ENSG00000173272	protein_coding	0.247957	1.6052e-10
ZNF707	ENSG00000181135	protein_coding	0.247903	1.62049e-10
NCAPH2	ENSG00000025770	protein_coding	0.247848	1.6362e-10
FAM53A	ENSG00000174137	protein_coding	0.247834	1.63998e-10
EXOSC8	ENSG00000120699	protein_coding	0.247797	1.65071e-10
NDUFS8	ENSG00000110717	protein_coding	0.247786	1.6539e-10
CCDC115	ENSG00000136710	protein_coding	0.247731	1.66984e-10
ZNF205	ENSG00000122386	protein_coding	0.24739	1.77176e-10
WDR18	ENSG00000065268	protein_coding	0.247375	1.77641e-10
STK38	ENSG00000112079	protein_coding	0.247237	1.81953e-10
TRPT1	ENSG00000149743	protein_coding	0.247159	1.84431e-10
ERAL1	ENSG00000132591	protein_coding	0.247149	1.84769e-10
CNPPD1	ENSG00000115649	protein_coding	0.247107	1.86094e-10
PNKD	ENSG00000127838	protein_coding	0.2471	1.86335e-10
ZDHHC12	ENSG00000160446	protein_coding	0.247043	1.88187e-10
LSM10	ENSG00000181817	protein_coding	0.247028	1.88686e-10
TMPRSS6	ENSG00000187045	protein_coding	0.24696	1.90907e-10
TMEM74B	ENSG00000125895	protein_coding	0.246956	1.91034e-10
PGRMC1	ENSG00000101856	protein_coding	0.246933	1.91802e-10
GDF10	ENSG00000266524	protein_coding	0.246921	1.92207e-10
RPS16	ENSG00000105193	protein_coding	0.246868	1.9397e-10
GFOD2	ENSG00000141098	protein_coding	0.246825	1.95435e-10
TSEN2	ENSG00000154743	protein_coding	0.246765	1.97487e-10
PIDD1	ENSG00000177595	protein_coding	0.246761	1.97626e-10
STRIP1	ENSG00000143093	protein_coding	0.246653	2.01335e-10
TMEM222	ENSG00000186501	protein_coding	0.246646	2.0158e-10
MAB21L3	ENSG00000173212	protein_coding	0.24655	2.04967e-10
KLHDC3	ENSG00000124702	protein_coding	0.246521	2.06001e-10
GRB7	ENSG00000141738	protein_coding	0.246454	2.08411e-10
BRMS1	ENSG00000174744	protein_coding	0.24645	2.08573e-10
PSMB1	ENSG00000008018	protein_coding	0.246445	2.08742e-10
GFER	ENSG00000127554	protein_coding	0.246397	2.10493e-10
SETMAR	ENSG00000170364	protein_coding	0.24627	2.15154e-10
FASTK	ENSG00000164896	protein_coding	0.245882	2.30061e-10
IMPDH1	ENSG00000106348	protein_coding	0.245785	2.33965e-10
CYP2D6	ENSG00000100197	protein_coding	0.245751	2.35353e-10
PRICKLE3	ENSG00000012211	protein_coding	0.245691	2.37785e-10
MRPS24	ENSG00000062582	protein_coding	0.245524	2.44741e-10
ZNF608	ENSG00000168916	protein_coding	0.245503	2.45637e-10
MAP2K2	ENSG00000126934	protein_coding	0.245494	2.46016e-10
NAALADL2	ENSG00000177694	protein_coding	0.245448	2.47978e-10
D2HGDH	ENSG00000180902	protein_coding	0.245444	2.48153e-10
CHKA	ENSG00000110721	protein_coding	0.245442	2.48203e-10
BCL7C	ENSG00000099385	protein_coding	0.245407	2.49723e-10
NDUFA11	ENSG00000174886	protein_coding	0.24526	2.56119e-10
DEF8	ENSG00000140995	protein_coding	0.245204	2.58625e-10
DCTN5	ENSG00000166847	protein_coding	0.245123	2.62232e-10
AC233992.2	ENSG00000271698	protein_coding	0.245024	2.66751e-10
EMD	ENSG00000102119	protein_coding	0.244944	2.70449e-10
APEH	ENSG00000164062	protein_coding	0.244937	2.70771e-10
TSR2	ENSG00000158526	protein_coding	0.2449	2.72481e-10
EFNB1	ENSG00000090776	protein_coding	0.244875	2.7369e-10
B3GAT3	ENSG00000149541	protein_coding	0.244786	2.77883e-10
SREBF2	ENSG00000198911	protein_coding	0.244732	2.80478e-10
C1orf105	ENSG00000180999	protein_coding	0.24469	2.82495e-10
PDK2	ENSG00000005882	protein_coding	0.244684	2.8282e-10
RPS19	ENSG00000105372	protein_coding	0.244594	2.87212e-10
RAB25	ENSG00000132698	protein_coding	0.244459	2.93914e-10
PRR5L	ENSG00000135362	protein_coding	0.244393	2.97299e-10
MVB12B	ENSG00000196814	protein_coding	0.244255	3.04402e-10
ZNF251	ENSG00000198169	protein_coding	0.244213	3.06602e-10
RUVBL1	ENSG00000175792	protein_coding	0.244188	3.07922e-10
RPL32	ENSG00000144713	protein_coding	0.244059	3.14826e-10
B3GNT3	ENSG00000179913	protein_coding	0.244037	3.15995e-10
ANKS3	ENSG00000168096	protein_coding	0.244006	3.17692e-10
SLC11A2	ENSG00000110911	protein_coding	0.243934	3.21633e-10
MISP3	ENSG00000141854	protein_coding	0.243898	3.23598e-10
MYZAP	ENSG00000263155	protein_coding	0.243895	3.23754e-10
POLDIP2	ENSG00000004142	protein_coding	0.243765	3.31043e-10
HSDL2	ENSG00000119471	protein_coding	0.243714	3.33952e-10
DUSP22	ENSG00000112679	protein_coding	0.243678	3.36032e-10
FTL	ENSG00000087086	protein_coding	0.243611	3.39893e-10
GNPDA1	ENSG00000113552	protein_coding	0.243595	3.40847e-10
NONO	ENSG00000147140	protein_coding	0.243538	3.44152e-10
RPL23A	ENSG00000198242	protein_coding	0.243467	3.48369e-10
TBC1D25	ENSG00000068354	protein_coding	0.243452	3.49228e-10
MAN1B1	ENSG00000177239	protein_coding	0.243194	3.64972e-10
RPSA	ENSG00000168028	protein_coding	0.24311	3.70225e-10
RPS15	ENSG00000115268	protein_coding	0.243087	3.71694e-10
CHTF18	ENSG00000127586	protein_coding	0.243058	3.73574e-10
PYCR1	ENSG00000183010	protein_coding	0.242917	3.8261e-10
MAFG	ENSG00000197063	protein_coding	0.242757	3.93219e-10
TFCP2L1	ENSG00000115112	protein_coding	0.242594	4.04262e-10
ZC3H18	ENSG00000158545	protein_coding	0.242508	4.10229e-10
ENPP3	ENSG00000154269	protein_coding	0.242265	4.27532e-10
PCBP1	ENSG00000169564	protein_coding	0.242233	4.29893e-10
NR1H3	ENSG00000025434	protein_coding	0.242213	4.31318e-10
CACHD1	ENSG00000158966	protein_coding	0.242168	4.3461e-10
RPL13A	ENSG00000142541	protein_coding	0.242105	4.39287e-10
NME1	ENSG00000239672	protein_coding	0.242055	4.43031e-10
YAE1	ENSG00000241127	protein_coding	0.242036	4.44486e-10
LMAN2	ENSG00000169223	protein_coding	0.24189	4.55605e-10
C2	ENSG00000166278	protein_coding	0.241883	4.56177e-10
KRT32	ENSG00000108759	protein_coding	0.241809	4.61926e-10
ZNF316	ENSG00000205903	protein_coding	0.241787	4.63664e-10
PPM1H	ENSG00000111110	protein_coding	0.241774	4.64692e-10
MUTYH	ENSG00000132781	protein_coding	0.241694	4.71071e-10
POLM	ENSG00000122678	protein_coding	0.241683	4.71891e-10
EDAR	ENSG00000135960	protein_coding	0.241602	4.78461e-10
RPP21	ENSG00000241370	protein_coding	0.241525	4.84691e-10
FAM110A	ENSG00000125898	protein_coding	0.241494	4.87312e-10
EIF2B1	ENSG00000111361	protein_coding	0.241453	4.90696e-10
AIFM1	ENSG00000156709	protein_coding	0.241381	4.96655e-10
CCDC86	ENSG00000110104	protein_coding	0.241285	5.04799e-10
PRR7	ENSG00000131188	protein_coding	0.241261	5.06884e-10
SLC7A1	ENSG00000139514	protein_coding	0.241232	5.09365e-10
GGT6	ENSG00000167741	protein_coding	0.241102	5.20661e-10
RBM10	ENSG00000182872	protein_coding	0.241039	5.26307e-10
NAXE	ENSG00000163382	protein_coding	0.240946	5.34581e-10
ASIC2	ENSG00000108684	protein_coding	0.240875	5.41096e-10
RPL15	ENSG00000174748	protein_coding	0.240829	5.45319e-10
MOGS	ENSG00000115275	protein_coding	0.24074	5.5349e-10
UBXN1	ENSG00000162191	protein_coding	0.240733	5.54186e-10
ESRRG	ENSG00000196482	protein_coding	0.240723	5.55127e-10
HAGH	ENSG00000063854	protein_coding	0.240704	5.56883e-10
PPP1CA	ENSG00000172531	protein_coding	0.240671	5.59971e-10
ZSCAN2	ENSG00000176371	protein_coding	0.240632	5.63731e-10
CORO7	ENSG00000262246	protein_coding	0.24055	5.71525e-10
TMED4	ENSG00000158604	protein_coding	0.240548	5.71723e-10
MPG	ENSG00000103152	protein_coding	0.240525	5.73926e-10
ACTR3B	ENSG00000133627	protein_coding	0.24034	5.92133e-10
SLC2A12	ENSG00000146411	protein_coding	0.240335	5.92623e-10
FBXO46	ENSG00000177051	protein_coding	0.240309	5.95304e-10
GBGT1	ENSG00000148288	protein_coding	0.240292	5.96998e-10
PIPOX	ENSG00000179761	protein_coding	0.240222	6.04033e-10
BMP4	ENSG00000125378	protein_coding	0.240133	6.13135e-10
NDUFA13	ENSG00000186010	protein_coding	0.24008	6.18659e-10
NDUFB10	ENSG00000140990	protein_coding	0.239965	6.30791e-10
ABCC1	ENSG00000103222	protein_coding	0.239934	6.33988e-10
SMPD4	ENSG00000136699	protein_coding	0.23989	6.38795e-10
CDK20	ENSG00000156345	protein_coding	0.239846	6.43437e-10
SDF2	ENSG00000132581	protein_coding	0.239767	6.52062e-10
ZNF593	ENSG00000142684	protein_coding	0.23971	6.5832e-10
HPCAL1	ENSG00000115756	protein_coding	0.239648	6.65264e-10
KIAA2013	ENSG00000116685	protein_coding	0.239549	6.76381e-10
TRIM54	ENSG00000138100	protein_coding	0.239546	6.76794e-10
ETNK2	ENSG00000143845	protein_coding	0.239421	6.91086e-10
MALSU1	ENSG00000156928	protein_coding	0.239411	6.92314e-10
SLC2A4	ENSG00000181856	protein_coding	0.239359	6.98354e-10
YIPF2	ENSG00000130733	protein_coding	0.239307	7.04471e-10
TIMM8B	ENSG00000150779	protein_coding	0.239253	7.10825e-10
MFSD10	ENSG00000109736	protein_coding	0.239206	7.16445e-10
SS18L1	ENSG00000184402	protein_coding	0.239054	7.34937e-10
SUOX	ENSG00000139531	protein_coding	0.239033	7.37536e-10
AGPAT2	ENSG00000169692	protein_coding	0.239028	7.3822e-10
FUZ	ENSG00000010361	protein_coding	0.238957	7.46944e-10
ING5	ENSG00000168395	protein_coding	0.238831	7.62946e-10
SRPK3	ENSG00000184343	protein_coding	0.238829	7.63229e-10
TAF1C	ENSG00000103168	protein_coding	0.238824	7.63809e-10
EEF1B2	ENSG00000114942	protein_coding	0.238813	7.65238e-10
KRT35	ENSG00000197079	protein_coding	0.238799	7.67032e-10
YWHAB	ENSG00000166913	protein_coding	0.238616	7.90892e-10
NDFIP2	ENSG00000102471	protein_coding	0.238568	7.97168e-10
NAPRT	ENSG00000147813	protein_coding	0.238489	8.07783e-10
CLIP2	ENSG00000106665	protein_coding	0.238433	8.1536e-10
CLDN9	ENSG00000213937	protein_coding	0.23842	8.17239e-10
IFNLR1	ENSG00000185436	protein_coding	0.238396	8.20521e-10
IP6K2	ENSG00000068745	protein_coding	0.238304	8.33135e-10
CCDC71	ENSG00000177352	protein_coding	0.237951	8.83707e-10
DRG1	ENSG00000185721	protein_coding	0.237853	8.98194e-10
NAPA	ENSG00000105402	protein_coding	0.237833	9.01232e-10
ANKS4B	ENSG00000175311	protein_coding	0.237822	9.02982e-10
TEPSIN	ENSG00000167302	protein_coding	0.237701	9.21297e-10
YBX1	ENSG00000065978	protein_coding	0.237653	9.28649e-10
ABHD14A-ACY1	ENSG00000114786	protein_coding	0.237644	9.30022e-10
DCUN1D2	ENSG00000150401	protein_coding	0.237606	9.36054e-10
SNU13	ENSG00000100138	protein_coding	0.237601	9.36779e-10
POLR3K	ENSG00000161980	protein_coding	0.237542	9.45947e-10
MYB	ENSG00000118513	protein_coding	0.237429	9.63927e-10
ZNF574	ENSG00000105732	protein_coding	0.237427	9.6422e-10
SSUH2	ENSG00000125046	protein_coding	0.237227	9.96939e-10
TM4SF5	ENSG00000142484	protein_coding	0.237222	9.97752e-10
DTNBP1	ENSG00000047579	protein_coding	0.237176	1.00538e-09
ACBD6	ENSG00000230124	protein_coding	0.237135	1.01222e-09
GRHL2	ENSG00000083307	protein_coding	0.237074	1.02254e-09
ISOC2	ENSG00000063241	protein_coding	0.237063	1.02433e-09
GLYR1	ENSG00000140632	protein_coding	0.236963	1.0415e-09
SLC15A1	ENSG00000088386	protein_coding	0.23674	1.08072e-09
NUDT7	ENSG00000140876	protein_coding	0.236696	1.08865e-09
LNX2	ENSG00000139517	protein_coding	0.236672	1.09296e-09
ATRAID	ENSG00000138085	protein_coding	0.236659	1.09547e-09
SDHAF1	ENSG00000205138	protein_coding	0.236561	1.11333e-09
PTCD3	ENSG00000132300	protein_coding	0.23635	1.15297e-09
TMEM63A	ENSG00000196187	protein_coding	0.236326	1.15745e-09
TSR3	ENSG00000007520	protein_coding	0.236313	1.1599e-09
PPP1R14B	ENSG00000173457	protein_coding	0.236298	1.16278e-09
ZNF34	ENSG00000196378	protein_coding	0.23614	1.19369e-09
CGREF1	ENSG00000138028	protein_coding	0.236092	1.20315e-09
RPL28	ENSG00000108107	protein_coding	0.235976	1.22652e-09
NUDT22	ENSG00000149761	protein_coding	0.235971	1.22738e-09
SRSF6	ENSG00000124193	protein_coding	0.235965	1.22861e-09
FAM83H	ENSG00000180921	protein_coding	0.235928	1.2362e-09
CEP250	ENSG00000126001	protein_coding	0.23592	1.23788e-09
MON1B	ENSG00000103111	protein_coding	0.235901	1.24182e-09
SPRY2	ENSG00000136158	protein_coding	0.235877	1.24675e-09
GABRE	ENSG00000102287	protein_coding	0.235767	1.26948e-09
MMP24	ENSG00000125966	protein_coding	0.235765	1.26998e-09
TMEM160	ENSG00000130748	protein_coding	0.235762	1.27054e-09
ING4	ENSG00000111653	protein_coding	0.235442	1.33951e-09
CAPN1	ENSG00000014216	protein_coding	0.235404	1.34772e-09
DCAF4	ENSG00000119599	protein_coding	0.235393	1.35032e-09
SLC2A4RG	ENSG00000125520	protein_coding	0.235346	1.36066e-09
CCDC137	ENSG00000185298	protein_coding	0.235313	1.3681e-09
LAMTOR2	ENSG00000116586	protein_coding	0.235298	1.37157e-09
C19orf53	ENSG00000104979	protein_coding	0.235229	1.38733e-09
LIMS2	ENSG00000072163	protein_coding	0.235125	1.41126e-09
TCF3	ENSG00000071564	protein_coding	0.235065	1.4251e-09
CIAPIN1	ENSG00000005194	protein_coding	0.235061	1.42614e-09
MCMDC2	ENSG00000178460	protein_coding	0.234986	1.44382e-09
POLR3C	ENSG00000186141	protein_coding	0.234961	1.44968e-09
GAL3ST1	ENSG00000128242	protein_coding	0.234933	1.45641e-09
PDXP	ENSG00000241360	protein_coding	0.234757	1.49921e-09
UFSP1	ENSG00000176125	protein_coding	0.234718	1.50893e-09
EIF2B3	ENSG00000070785	protein_coding	0.234707	1.5116e-09
RNF5	ENSG00000204308	protein_coding	0.234697	1.51408e-09
PSMB3	ENSG00000277791	protein_coding	0.234661	1.52294e-09
DKK4	ENSG00000104371	protein_coding	0.234638	1.52881e-09
RPL35	ENSG00000136942	protein_coding	0.234633	1.53013e-09
CHMP4C	ENSG00000164695	protein_coding	0.234609	1.53622e-09
IGFL4	ENSG00000204869	protein_coding	0.234519	1.559e-09
UQCRC1	ENSG00000010256	protein_coding	0.234512	1.56076e-09
PUDP	ENSG00000130021	protein_coding	0.2345	1.5639e-09
SLC12A7	ENSG00000113504	protein_coding	0.234471	1.57144e-09
ARHGAP45	ENSG00000180448	protein_coding	0.234353	1.60205e-09
WRNIP1	ENSG00000124535	protein_coding	0.234206	1.64103e-09
PPP1R37	ENSG00000104866	protein_coding	0.234042	1.68592e-09
RCE1	ENSG00000173653	protein_coding	0.234033	1.68832e-09
HPS4	ENSG00000100099	protein_coding	0.233799	1.7541e-09
PSMD4	ENSG00000159352	protein_coding	0.233685	1.78733e-09
CDKN1C	ENSG00000129757	protein_coding	0.233544	1.829e-09
XKRX	ENSG00000182489	protein_coding	0.23353	1.83314e-09
CHMP2A	ENSG00000130724	protein_coding	0.233468	1.85166e-09
DFFB	ENSG00000169598	protein_coding	0.233401	1.8721e-09
BHLHA9	ENSG00000205899	protein_coding	0.233334	1.89259e-09
CDC123	ENSG00000151465	protein_coding	0.233216	1.92952e-09
DNAJC15	ENSG00000120675	protein_coding	0.233187	1.93861e-09
SCML4	ENSG00000146285	protein_coding	0.233157	1.94808e-09
ZP2	ENSG00000103310	protein_coding	0.23312	1.95997e-09
RGMB	ENSG00000174136	protein_coding	0.232999	1.99884e-09
USPL1	ENSG00000132952	protein_coding	0.232885	2.03652e-09
KRT36	ENSG00000126337	protein_coding	0.232815	2.05992e-09
PRR14	ENSG00000156858	protein_coding	0.232814	2.06022e-09
LYPLA2	ENSG00000011009	protein_coding	0.232754	2.0803e-09
FHOD3	ENSG00000134775	protein_coding	0.23273	2.08854e-09
RBBP7	ENSG00000102054	protein_coding	0.232659	2.11267e-09
MED22	ENSG00000148297	protein_coding	0.23259	2.1368e-09
TMEM94	ENSG00000177728	protein_coding	0.232521	2.16074e-09
MVB12A	ENSG00000141971	protein_coding	0.232493	2.17063e-09
MTMR8	ENSG00000102043	protein_coding	0.232401	2.20349e-09
SULT1A1	ENSG00000196502	protein_coding	0.232396	2.20526e-09
CCT5	ENSG00000150753	protein_coding	0.232287	2.24444e-09
GJC3	ENSG00000176402	protein_coding	0.232225	2.26708e-09
NDUFB9	ENSG00000147684	protein_coding	0.232224	2.26758e-09
COQ9	ENSG00000088682	protein_coding	0.232205	2.27461e-09
MEN1	ENSG00000133895	protein_coding	0.232187	2.28134e-09
AAMP	ENSG00000127837	protein_coding	0.232128	2.30325e-09
RNH1	ENSG00000023191	protein_coding	0.231979	2.3597e-09
CYB561D2	ENSG00000114395	protein_coding	0.231974	2.36145e-09
PERP	ENSG00000112378	protein_coding	0.231877	2.39899e-09
RFC3	ENSG00000133119	protein_coding	0.231667	2.48216e-09
HCN3	ENSG00000143630	protein_coding	0.231596	2.51067e-09
MRPL13	ENSG00000172172	protein_coding	0.231464	2.56511e-09
KRT37	ENSG00000108417	protein_coding	0.231452	2.56987e-09
SPSB3	ENSG00000162032	protein_coding	0.231444	2.57334e-09
CTPS2	ENSG00000047230	protein_coding	0.231356	2.61014e-09
PTK6	ENSG00000101213	protein_coding	0.231326	2.62285e-09
MOSPD3	ENSG00000106330	protein_coding	0.231262	2.65035e-09
PAXX	ENSG00000148362	protein_coding	0.231151	2.69825e-09
PGGHG	ENSG00000142102	protein_coding	0.231116	2.7136e-09
SGSH	ENSG00000181523	protein_coding	0.231088	2.72586e-09
PAM16	ENSG00000217930	protein_coding	0.231088	2.72592e-09
HDAC6	ENSG00000094631	protein_coding	0.231022	2.75488e-09
MRPS25	ENSG00000131368	protein_coding	0.231022	2.75495e-09
SMIM32	ENSG00000271824	protein_coding	0.231015	2.75809e-09
PKP1	ENSG00000081277	protein_coding	0.231009	2.7608e-09
NPY4R2	ENSG00000264717	protein_coding	0.230987	2.7707e-09
FRS3	ENSG00000137218	protein_coding	0.230968	2.77916e-09
DCTN3	ENSG00000137100	protein_coding	0.23094	2.79164e-09
NUP85	ENSG00000125450	protein_coding	0.23085	2.83237e-09
IRF2BP1	ENSG00000170604	protein_coding	0.230812	2.84998e-09
MEPCE	ENSG00000146834	protein_coding	0.23081	2.8508e-09
ARHGAP27	ENSG00000159314	protein_coding	0.230801	2.85494e-09
CAMKV	ENSG00000164076	protein_coding	0.230729	2.8884e-09
USP5	ENSG00000111667	protein_coding	0.230601	2.94852e-09
KRT75	ENSG00000170454	protein_coding	0.230538	2.9789e-09
SLC9A3	ENSG00000066230	protein_coding	0.230501	2.99653e-09
MAPRE1	ENSG00000101367	protein_coding	0.230431	3.03037e-09
PPP4C	ENSG00000149923	protein_coding	0.230281	3.10482e-09
C17orf99	ENSG00000187997	protein_coding	0.2302	3.1455e-09
PRADC1	ENSG00000135617	protein_coding	0.23018	3.15531e-09
IZUMO2	ENSG00000161652	protein_coding	0.23017	3.16048e-09
RNASEH2B	ENSG00000136104	protein_coding	0.230121	3.1856e-09
MOB2	ENSG00000182208	protein_coding	0.230113	3.18974e-09
PPIH	ENSG00000171960	protein_coding	0.230076	3.20896e-09
ACVR1B	ENSG00000135503	protein_coding	0.230053	3.22044e-09
CTSV	ENSG00000136943	protein_coding	0.230047	3.22377e-09
ZNF202	ENSG00000166261	protein_coding	0.229984	3.25641e-09
DDN	ENSG00000181418	protein_coding	0.229979	3.25928e-09
ZDHHC4	ENSG00000136247	protein_coding	0.229956	3.27137e-09
NEURL1B	ENSG00000214357	protein_coding	0.229949	3.27468e-09
NDUFAF8	ENSG00000224877	protein_coding	0.229924	3.28812e-09
FADS6	ENSG00000172782	protein_coding	0.229856	3.32398e-09
AURKAIP1	ENSG00000175756	protein_coding	0.229798	3.35554e-09
MMEL1	ENSG00000142606	protein_coding	0.229785	3.36212e-09
SMIM24	ENSG00000095932	protein_coding	0.229658	3.43146e-09
MPC1L	ENSG00000238205	protein_coding	0.229649	3.43635e-09
POLR2E	ENSG00000099817	protein_coding	0.229641	3.44119e-09
PRKCSH	ENSG00000130175	protein_coding	0.229607	3.46007e-09
CSK	ENSG00000103653	protein_coding	0.229588	3.47061e-09
TOX3	ENSG00000103460	protein_coding	0.229569	3.48085e-09
SUGP1	ENSG00000105705	protein_coding	0.229517	3.51015e-09
ELMO2	ENSG00000062598	protein_coding	0.229332	3.61555e-09
CCDC120	ENSG00000147144	protein_coding	0.229303	3.63239e-09
TBC1D22A	ENSG00000054611	protein_coding	0.229163	3.71532e-09
MRPS23	ENSG00000181610	protein_coding	0.229128	3.73585e-09
TFDP1	ENSG00000198176	protein_coding	0.229065	3.77384e-09
TNNC1	ENSG00000114854	protein_coding	0.229053	3.78075e-09
COX6B1	ENSG00000126267	protein_coding	0.228856	3.90211e-09
FTSJ1	ENSG00000068438	protein_coding	0.228833	3.91664e-09
CAMKMT	ENSG00000143919	protein_coding	0.228824	3.92185e-09
ZNF563	ENSG00000188868	protein_coding	0.228744	3.97278e-09
TLCD1	ENSG00000160606	protein_coding	0.228732	3.98048e-09
RPL21	ENSG00000122026	protein_coding	0.228721	3.98714e-09
DNMT3A	ENSG00000119772	protein_coding	0.228711	3.99388e-09
RRAGA	ENSG00000155876	protein_coding	0.228655	4.02943e-09
RTN4IP1	ENSG00000130347	protein_coding	0.228615	4.05531e-09
TMEM258	ENSG00000134825	protein_coding	0.228541	4.1033e-09
WDR83OS	ENSG00000105583	protein_coding	0.228515	4.12076e-09
CRCP	ENSG00000241258	protein_coding	0.228418	4.18513e-09
PLPP2	ENSG00000141934	protein_coding	0.228416	4.18626e-09
MPND	ENSG00000008382	protein_coding	0.228387	4.20556e-09
NAA60	ENSG00000122390	protein_coding	0.228311	4.25664e-09
PTPN1	ENSG00000196396	protein_coding	0.228268	4.28653e-09
HIRA	ENSG00000100084	protein_coding	0.228107	4.39801e-09
MAPK14	ENSG00000112062	protein_coding	0.227998	4.47468e-09
RUSF1	ENSG00000140688	protein_coding	0.227882	4.5579e-09
ZBTB7B	ENSG00000160685	protein_coding	0.227871	4.56609e-09
TMEM141	ENSG00000244187	protein_coding	0.227799	4.61851e-09
NFKBIB	ENSG00000104825	protein_coding	0.227795	4.62136e-09
SLC1A4	ENSG00000115902	protein_coding	0.227768	4.64167e-09
IPO13	ENSG00000117408	protein_coding	0.227741	4.66163e-09
CUX1	ENSG00000257923	protein_coding	0.227604	4.76427e-09
TCTA	ENSG00000145022	protein_coding	0.227594	4.77166e-09
MGRN1	ENSG00000102858	protein_coding	0.227405	4.91708e-09
COG8	ENSG00000213380	protein_coding	0.227274	5.02069e-09
SBF1	ENSG00000100241	protein_coding	0.227232	5.05455e-09
TNMD	ENSG00000000005	protein_coding	0.227224	5.06041e-09
SLC13A2	ENSG00000007216	protein_coding	0.227137	5.13114e-09
RPS8	ENSG00000142937	protein_coding	0.227133	5.1341e-09
DMAC2	ENSG00000105341	protein_coding	0.227112	5.15114e-09
RNF186	ENSG00000178828	protein_coding	0.227112	5.15121e-09
RPL5	ENSG00000122406	protein_coding	0.227033	5.21658e-09
GRAP	ENSG00000154016	protein_coding	0.227009	5.23629e-09
SHISA9	ENSG00000237515	protein_coding	0.226959	5.27766e-09
SLC45A2	ENSG00000164175	protein_coding	0.226911	5.31793e-09
WDR24	ENSG00000127580	protein_coding	0.226904	5.32441e-09
FBRSL1	ENSG00000112787	protein_coding	0.226847	5.37281e-09
C1orf127	ENSG00000175262	protein_coding	0.226814	5.40091e-09
SIRT6	ENSG00000077463	protein_coding	0.22678	5.42975e-09
AP2A2	ENSG00000183020	protein_coding	0.226715	5.48604e-09
CSNK1D	ENSG00000141551	protein_coding	0.226592	5.59385e-09
VAC14	ENSG00000103043	protein_coding	0.226546	5.63496e-09
THAP4	ENSG00000176946	protein_coding	0.2265	5.67627e-09
STC2	ENSG00000113739	protein_coding	0.22646	5.7117e-09
TMEM259	ENSG00000182087	protein_coding	0.226446	5.7243e-09
MYEF2	ENSG00000104177	protein_coding	0.226391	5.77467e-09
TSPAN7	ENSG00000156298	protein_coding	0.226318	5.8415e-09
NSG1	ENSG00000168824	protein_coding	0.22626	5.89533e-09
POLR1A	ENSG00000068654	protein_coding	0.226193	5.95797e-09
TRMT2B	ENSG00000188917	protein_coding	0.226139	6.00882e-09
TAF10	ENSG00000166337	protein_coding	0.226098	6.04848e-09
PSMD3	ENSG00000108344	protein_coding	0.226089	6.05682e-09
INTS11	ENSG00000127054	protein_coding	0.226048	6.09648e-09
SNX21	ENSG00000124104	protein_coding	0.226013	6.13017e-09
ENOX2	ENSG00000165675	protein_coding	0.22597	6.1718e-09
U2AF2	ENSG00000063244	protein_coding	0.225958	6.18366e-09
TMEM147	ENSG00000105677	protein_coding	0.225864	6.27556e-09
PRDM11	ENSG00000019485	protein_coding	0.225821	6.31824e-09
PHETA1	ENSG00000198324	protein_coding	0.225704	6.43577e-09
KIFC2	ENSG00000167702	protein_coding	0.225659	6.48117e-09
ENTR1	ENSG00000165689	protein_coding	0.225572	6.57085e-09
DTYMK	ENSG00000168393	protein_coding	0.225564	6.57935e-09
ADNP	ENSG00000101126	protein_coding	0.225559	6.5846e-09
NARF	ENSG00000141562	protein_coding	0.225557	6.58651e-09
SYNE4	ENSG00000181392	protein_coding	0.225553	6.59128e-09
PANK1	ENSG00000152782	protein_coding	0.225449	6.69925e-09
CCS	ENSG00000173992	protein_coding	0.225422	6.72852e-09
NDUFB2	ENSG00000090266	protein_coding	0.225407	6.7442e-09
TRAIP	ENSG00000183763	protein_coding	0.225329	6.82783e-09
CYFIP2	ENSG00000055163	protein_coding	0.225249	6.91415e-09
GPRIN2	ENSG00000204175	protein_coding	0.225025	7.16169e-09
NEU4	ENSG00000204099	protein_coding	0.225007	7.18231e-09
KLHL36	ENSG00000135686	protein_coding	0.224964	7.23076e-09
UBE2I	ENSG00000103275	protein_coding	0.224947	7.25017e-09
SLC4A2	ENSG00000164889	protein_coding	0.224941	7.25689e-09
TSPO	ENSG00000100300	protein_coding	0.224907	7.29517e-09
SNRPD2	ENSG00000125743	protein_coding	0.224868	7.34004e-09
ODC1	ENSG00000115758	protein_coding	0.224829	7.3855e-09
C1orf35	ENSG00000143793	protein_coding	0.224816	7.4e-09
TSEN34	ENSG00000170892	protein_coding	0.224797	7.42258e-09
CLIC1	ENSG00000213719	protein_coding	0.224784	7.43748e-09
KAT14	ENSG00000149474	protein_coding	0.224772	7.45137e-09
LEMD2	ENSG00000161904	protein_coding	0.224575	7.68535e-09
AP1M2	ENSG00000129354	protein_coding	0.224572	7.68933e-09
NOL6	ENSG00000165271	protein_coding	0.224552	7.71286e-09
EDC4	ENSG00000038358	protein_coding	0.224534	7.73484e-09
CTSH	ENSG00000103811	protein_coding	0.224483	7.79689e-09
GIPC1	ENSG00000123159	protein_coding	0.224451	7.83675e-09
OTUD5	ENSG00000068308	protein_coding	0.224377	7.92822e-09
PSME3IP1	ENSG00000172775	protein_coding	0.224246	8.09186e-09
NRXN2	ENSG00000110076	protein_coding	0.224211	8.13695e-09
CDT1	ENSG00000167513	protein_coding	0.224111	8.26495e-09
ATP5F1D	ENSG00000099624	protein_coding	0.224018	8.38521e-09
HSF4	ENSG00000102878	protein_coding	0.22391	8.52827e-09
RPL12	ENSG00000197958	protein_coding	0.223759	8.73253e-09
GADD45GIP1	ENSG00000179271	protein_coding	0.223705	8.80634e-09
STX3	ENSG00000166900	protein_coding	0.223674	8.84868e-09
CAD	ENSG00000084774	protein_coding	0.223626	8.9149e-09
KARS1	ENSG00000065427	protein_coding	0.22362	8.92367e-09
LSS	ENSG00000160285	protein_coding	0.223508	9.08085e-09
ROGDI	ENSG00000067836	protein_coding	0.223507	9.08194e-09
GABRD	ENSG00000187730	protein_coding	0.223476	9.12643e-09
AGBL5	ENSG00000084693	protein_coding	0.223363	9.28808e-09
MRPL45	ENSG00000278845	protein_coding	0.223338	9.3252e-09
EPHA1	ENSG00000146904	protein_coding	0.223332	9.33383e-09
TSTD1	ENSG00000215845	protein_coding	0.223331	9.33563e-09
IGFBP2	ENSG00000115457	protein_coding	0.223173	9.56775e-09
FGD1	ENSG00000102302	protein_coding	0.223155	9.59397e-09
RELL2	ENSG00000164620	protein_coding	0.223154	9.596e-09
KRT39	ENSG00000196859	protein_coding	0.223052	9.74959e-09
PNO1	ENSG00000115946	protein_coding	0.223035	9.77566e-09
ANKK1	ENSG00000170209	protein_coding	0.22291	9.96742e-09
SUMF2	ENSG00000129103	protein_coding	0.222892	9.99494e-09
COX7B	ENSG00000131174	protein_coding	0.222855	1.00524e-08
ERCC2	ENSG00000104884	protein_coding	0.222704	1.02917e-08
AP2A1	ENSG00000196961	protein_coding	0.22265	1.03789e-08
GGA3	ENSG00000125447	protein_coding	0.222599	1.04608e-08
HPS6	ENSG00000166189	protein_coding	0.222598	1.04619e-08
AP1S1	ENSG00000106367	protein_coding	0.222592	1.04727e-08
BDH1	ENSG00000161267	protein_coding	0.222571	1.05065e-08
MYLIP	ENSG00000007944	protein_coding	0.222555	1.05332e-08
ZNF250	ENSG00000196150	protein_coding	0.222544	1.05514e-08
WDR5	ENSG00000196363	protein_coding	0.222522	1.05876e-08
MYL3	ENSG00000160808	protein_coding	0.222495	1.0632e-08
CDIP1	ENSG00000089486	protein_coding	0.222437	1.07277e-08
MRPL58	ENSG00000167862	protein_coding	0.222379	1.08246e-08
THYN1	ENSG00000151500	protein_coding	0.222351	1.08713e-08
QPCT	ENSG00000115828	protein_coding	0.22232	1.09233e-08
NEUROD1	ENSG00000162992	protein_coding	0.222292	1.09707e-08
NDUFS7	ENSG00000115286	protein_coding	0.222219	1.10967e-08
KEAP1	ENSG00000079999	protein_coding	0.22215	1.12149e-08
NDUFA2	ENSG00000131495	protein_coding	0.222121	1.12667e-08
AMMECR1L	ENSG00000144233	protein_coding	0.22198	1.15159e-08
MYO10	ENSG00000145555	protein_coding	0.221919	1.1624e-08
RNASEH2A	ENSG00000104889	protein_coding	0.221906	1.16473e-08
NOP14	ENSG00000087269	protein_coding	0.221882	1.16907e-08
GVQW3	ENSG00000179240	protein_coding	0.221879	1.16971e-08
RNPS1	ENSG00000205937	protein_coding	0.221877	1.16993e-08
NEK6	ENSG00000119408	protein_coding	0.221855	1.17391e-08
SETDB2	ENSG00000136169	protein_coding	0.221838	1.17716e-08
MTTP	ENSG00000138823	protein_coding	0.221782	1.18741e-08
RFT1	ENSG00000163933	protein_coding	0.221723	1.19827e-08
NFATC2	ENSG00000101096	protein_coding	0.221723	1.19827e-08
TMED1	ENSG00000099203	protein_coding	0.221508	1.2387e-08
NSMCE2	ENSG00000156831	protein_coding	0.221497	1.24077e-08
FZD10	ENSG00000111432	protein_coding	0.221468	1.24637e-08
FAM207A	ENSG00000160256	protein_coding	0.221388	1.26185e-08
RAB11B	ENSG00000185236	protein_coding	0.221385	1.2625e-08
SLC29A2	ENSG00000174669	protein_coding	0.221177	1.30363e-08
TIMM8A	ENSG00000126953	protein_coding	0.220971	1.34578e-08
SURF6	ENSG00000148296	protein_coding	0.220829	1.37556e-08
CLASRP	ENSG00000104859	protein_coding	0.220828	1.37578e-08
ATAD3C	ENSG00000215915	protein_coding	0.220818	1.37793e-08
INHBB	ENSG00000163083	protein_coding	0.220765	1.38915e-08
ELAVL2	ENSG00000107105	protein_coding	0.220588	1.4274e-08
QDPR	ENSG00000151552	protein_coding	0.220538	1.43851e-08
MRPS18B	ENSG00000204568	protein_coding	0.220529	1.44049e-08
NCKIPSD	ENSG00000213672	protein_coding	0.220517	1.44308e-08
PWWP2B	ENSG00000171813	protein_coding	0.220486	1.45007e-08
GAS6	ENSG00000183087	protein_coding	0.220462	1.45551e-08
PITX1	ENSG00000069011	protein_coding	0.220411	1.46698e-08
RNF208	ENSG00000212864	protein_coding	0.220408	1.46764e-08
SURF2	ENSG00000148291	protein_coding	0.220257	1.50211e-08
MTCH1	ENSG00000137409	protein_coding	0.220236	1.50674e-08
SYMPK	ENSG00000125755	protein_coding	0.220228	1.50879e-08
ANKRD40CL	ENSG00000167117	protein_coding	0.220159	1.52473e-08
RSAD1	ENSG00000136444	protein_coding	0.220136	1.53015e-08
EFTUD2	ENSG00000108883	protein_coding	0.220125	1.53284e-08
TERT	ENSG00000164362	protein_coding	0.220083	1.54273e-08
[truncated: 17,451 more rows]
